1     **Chemical reprogramming ameliorates cellular hallmarks of**  
2                     **aging and extends lifespan**

3

4

5     Lucas Schoenfeldt<sup>1,2</sup>, Patrick T. Paine<sup>1,2</sup>, Nibrasul H. Kamaludeen M.<sup>1</sup>, Grace B.

6     Phelps<sup>1</sup>, Calida Mrabti<sup>1</sup>, Kevin Perez<sup>1</sup>, Alejandro Ocampo<sup>1,\*</sup>

7     <sup>1</sup>Department of Biomedical Sciences, Faculty of Biology and Medicine, University  
8     of Lausanne, Lausanne, Vaud, Switzerland.

9     <sup>2</sup>These authors contributed equally.

10    \*Correspondence: [alejandro.ocampo@unil.ch](mailto:alejandro.ocampo@unil.ch)

11 **ABSTRACT**

12 The dedifferentiation of somatic cells into a pluripotent state by cellular  
13 reprogramming coincides with a reversal of age-associated molecular hallmarks.  
14 Although transcription factor induced cellular reprogramming has been shown to  
15 ameliorate these aging phenotypes in human cells and extend health and lifespan  
16 in mice, translational applications of this approach are still limited. More recently,  
17 chemical reprogramming via small molecule cocktails have demonstrated a similar  
18 ability to induce pluripotency in vitro, however, its potential impact on aging is  
19 unknown. Here, we demonstrated that partial chemical reprogramming is able to  
20 improve key drivers of aging including genomic instability and epigenetic alterations  
21 in aged human cells. Moreover, we identified an optimized combination of two  
22 reprogramming molecules sufficient to induce the amelioration of additional aging  
23 phenotypes including cellular senescence and oxidative stress. Importantly, in vivo  
24 application of this two-chemical combination significantly extended *C. elegans*  
25 lifespan. Together, these data demonstrate that improvement of key drivers of aging  
26 and lifespan extension is possible via chemical induced partial reprogramming,  
27 opening a path towards future translational applications.

28

29 **KEYWORDS**

30 Aging, cellular reprogramming, chemical reprogramming, epigenetics, lifespan

31

32 **INTRODUCTION**

33 Biological aging is a global process associated with a loss of homeostasis and  
34 functional decline across cellular and physiological systems leading to the  
35 development of age-associated chronic diseases and finally death (Rando and  
36 Chang, 2012; Kennedy *et al.*, 2014). For this reason, a significant increase in

37 human life expectancy over the last decades has resulted in an extended period of  
38 life spent in morbidity (Garmany, Yamada and Terzic, 2021). As aging is a key risk  
39 factor for chronic diseases such as cardiovascular disease or neurodegenerative  
40 disorders, new therapeutic strategies that target aging are now under intense  
41 investigation (Niccoli and Partridge, 2012; Mahmoudi, Xu and Brunet, 2019).  
42 Several hallmarks of aging including epigenetic dysregulation, genomic instability,  
43 cellular senescence, and stem cell exhaustion have been identified as potential  
44 targets for such an optimized therapeutic strategy (López-Otín *et al.*, 2013). Current  
45 interventions that target aging include cellular reprogramming, dietary restriction  
46 and related mimetics, systemic blood factors, and senolytics. Among these, cellular  
47 reprogramming offers a unique prospective for its ability to reset the epigenome and  
48 restore multiple aging hallmarks (Conboy *et al.*, 2005; Baker *et al.*, 2011; Lapasset  
49 *et al.*, 2011; Longo *et al.*, 2015; Ocampo *et al.*, 2016; Olova *et al.*, 2019).  
50 During development, cellular reprogramming induces zygotic and primordial germ  
51 cell formation following a dramatic chromatin reorganization to create totipotent and  
52 pluripotent cells free of aged molecular defects demonstrating that both cell identity  
53 and age are reversible (Seisenberger *et al.*, 2013; Kerepesi *et al.*, 2021).  
54 Importantly, this manipulation of cell identity has been recapitulated in vitro by  
55 several methods including somatic cell nuclear transfer, forced expression of  
56 transcription factors, and most recently treatment with small molecules (Gurdon,  
57 1962; Takahashi and Yamanaka, 2006; Hou *et al.*, 2013).  
58 Although restoration of aged phenotypes such as telomere length, mitochondrial  
59 function, proliferation, and transcriptomic signature in vitro was demonstrated over  
60 a decade ago, application of cellular reprogramming in vivo was initially proven  
61 unsafe due to the loss of cellular identity leading to tumor and teratoma formation  
62 (Lapasset *et al.*, 2011; Abad *et al.*, 2013). To overcome this issue, in vivo partial

63 reprogramming by short-term cyclic induction of Oct4, Sox2, Klf4, and c-Myc  
64 (OSKM) was a critical advance as it avoided the detrimental loss of cellular identity.  
65 Importantly, this limited cyclic expression of OSKM was sufficient to ameliorate  
66 multiple aging hallmarks and extend the lifespan of a progeroid mouse strain  
67 (Ocampo *et al.*, 2016). Improved regenerative capacity and function has also been  
68 demonstrated following therapeutic application of cellular reprogramming in  
69 multiple tissues and organs including the intervertebral disc, heart, skin, skeletal  
70 muscle, liver, optic nerve, and dentate gyrus (Ocampo *et al.*, 2016; Kurita *et al.*,  
71 2018; de Lázaro *et al.*, 2019; Lu *et al.*, 2020; Rodríguez-Matellán *et al.*, 2020; Chen  
72 *et al.*, 2021; Cheng *et al.*, 2022; Hishida *et al.*, 2022). Furthermore, several groups  
73 have demonstrated the ability to restore multiple aging phenotypes and reset the  
74 epigenetic clock utilizing translational non-integrative methods such as modified  
75 mRNAs encoding for six transcription factors (OSKM + Lin28 and Nanog) or adeno-  
76 associated virus for expression of three factors (OSK) (Sarkar *et al.*, 2020; Lu *et al.*,  
77 2020). While promising, methods that require transcription factor expression face  
78 significant barriers for their clinical translation such as risk of tumorigenicity and low  
79 delivery efficiency (Abad *et al.*, 2013; Ohnishi *et al.*, 2014). In this line, c-Myc and  
80 Klf4 have been identified as proto-oncogenes while Oct4 and Sox2 are highly  
81 expressed in a variety of human cancers (Klimczak, 2015). For this reason, the  
82 clinical application of in vivo reprogramming may require further development.

83 Most recently, small molecule cocktails have been shown to produce chemical  
84 induced pluripotent stem cells (ciPSCs) from mouse and human somatic cells (Hou  
85 *et al.*, 2013; Guan *et al.*, 2022). These reprogramming compounds fall broadly into  
86 three categories including epigenetic, cell signaling, and metabolic modulators  
87 (Knyazer *et al.*, 2021). Importantly, small molecule reprogramming and OSKM  
88 expression share the ability to overcome multiple reprogramming barriers while

89 retaining a distinct cell fate trajectory (Zhao *et al.*, 2015; Haridhasapavalan *et al.*,  
90 2020). To date, the effects of chemical reprogramming on aging hallmarks and  
91 lifespan have not been investigated. Considering both the rejuvenating effects of  
92 partial reprogramming by short-term expression of OSKM and the ability of small  
93 molecule cocktails to induce pluripotency, we proposed the use of chemical induced  
94 partial reprogramming for the amelioration of aging phenotypes.  
95 Here, we report that short-term treatment of human cells with seven small  
96 molecules (7c), previously identified for their capacity to induce pluripotent stem  
97 cells, leads to the improvement of molecular hallmarks of aging. In addition, we  
98 show that an optimized cocktail, containing only two of these small molecules (2c),  
99 is sufficient to restore multiple aging phenotypes including genomic instability,  
100 epigenetic dysregulation, cellular senescence, and elevated reactive oxygen  
101 species. Finally, in vivo application of this 2c reprogramming cocktail extends  
102 lifespan in *C. elegans*.

103

## 104 **RESULTS**

### 105 **Chemical induced partial reprogramming significantly improves aging** 106 **hallmarks in aged human fibroblasts**

107 Multiple hallmarks of aging can be ameliorated following partial cellular  
108 reprogramming by expression of the Yamanaka factors (OSKM) in vitro and in vivo  
109 (Ocampo, Reddy and Belmonte, 2016). On the other hand, although chemical  
110 reprogramming with seven small molecules (7c) has been shown to generate  
111 chemically induced pluripotent stem cells (Hou *et al.*, 2013), whether chemical  
112 induced partial reprogramming is also able to restore aged phenotypes is unknown.  
113 Therefore, we sought to determine the effect of short-term 7c treatment on aging  
114 phenotypes in primary aged human fibroblasts (Fig. 1a). Specifically, we asked

115 whether chemical induced partial reprogramming could improve multiple hallmarks  
116 of aging, including DNA damage, heterochromatin loss, cellular senescence, and  
117 reactive oxygen species (ROS) in vitro. Towards this goal, primary human  
118 fibroblasts isolated from aged dermal tissue samples were treated for 6 days with a  
119 7c cocktail including: CHIR99021, DZNep, Forskolin, TTNPB, Valproic acid (VPA),  
120 Repsox, and Tranylcypromine (TCP). Notably, the levels of the DNA damage  
121 marker  $\gamma$ H2AX were significantly decreased in aged cells after treatment (Fig. 1b).  
122 Interestingly, a decrease in  $\gamma$ H2AX levels was also observed when 7c was added  
123 for 6 days to aged cells that were pretreated with the DNA damage inducing agent  
124 doxorubicin for 2 days, indicating a significantly improved DNA damage response  
125 upon 7c treatment (Fig. 1c). Thus, we determined that short-term 7c treatment  
126 improves DNA damage in primary aged human fibroblasts.

127 Epigenetic dysregulation and heterochromatin loss are key molecular markers of  
128 aging (Haithcock *et al.*, 2005; Scaffidi and Misteli, 2006; Ni *et al.*, 2012; Brunet and  
129 Berger, 2014; Djeghloul *et al.*, 2016; Kane and Sinclair, 2019). For this reason, we  
130 next examined the effect of 7c treatment on the constitutive and facultative  
131 heterochromatin marks H3K9me3 and H3K27me3. Our results show that 6 days of  
132 7c treatment significantly increased the constitutive heterochromatin mark  
133 H3K9me3 in aged human fibroblasts (Fig. 1d). In aged cells, previous work has  
134 shown that the facultative heterochromatin marker H3K27me3 is decreased at the  
135 senescence-associated *p16* gene locus (*CDKN2A*) leading to increased  
136 expression, cell cycle arrest, and senescence (Dhawan, Tschen and Bhushan,  
137 2009). Interestingly, we observed that H3K27me3 was significantly increased after  
138 6 days of 7c treatment (Fig. 1e). Next, as cellular senescence has been shown to  
139 be a key driver of aged tissue dysfunction and ablation of senescent cells has been  
140 demonstrated to extend health and lifespan in mice (Baker *et al.*, 2011), we

141 determined the impact of chemical induced partial reprogramming on senescence-  
142 associated gene expression. For this purpose, we serially passaged aged human  
143 fibroblasts for 28 days to promote replicative induced senescence (RIS) in the  
144 presence of continuous 7c treatment. Importantly, the 7c treated group showed a  
145 downregulation of the senescence-associated cell cycle genes *p21* and *p53* relative  
146 to untreated controls (Fig. 1f). On the other hand, we noted that the senescence-  
147 associated secretory cytokine *IL6* was significantly upregulated upon long-term  
148 treatment with 7c and therefore could not conclude a positive effect of 7c treatment  
149 on senescence (Fig. 1f and S1a).

150 Next, further characterization of the transcriptomic effects of 7c treatment for 6 days  
151 was performed by bulk RNA sequencing on aged fibroblasts treated with either 7c  
152 or vehicle control. Principle component analysis (PCA) showed that 7c treated cells  
153 clustered separately from the control group indicating that a distinct transcriptomic  
154 profile emerges following chemical induced partial reprogramming (Fig. 1g). Gene  
155 ontology (GO) enrichment analysis revealed that developmental processes were  
156 significantly upregulated following 7c treatment relative to control, whereas mitosis  
157 and cell proliferation programs were significantly downregulated (Fig. 1h).  
158 Interestingly, numerous cellular reprogramming, stem cell, and self-renewal genes  
159 within the GO term developmental pathways were significantly upregulated  
160 following 7c treatment compared to control including *WNT5a*, *NOTCH1A*, *SOX4*,  
161 *SALL1*, *NOG*, and *BMP4* indicating that 7c induced a shift towards a developmental  
162 associated transcriptomic profile (Fig. 1i and S1b).

163 Since our RNA seq analysis indicated a downregulation in mitosis and proliferation  
164 programs, we next evaluated the effect of 7c treatment on cellular proliferation. In  
165 agreement with these results, we observed that 7c significantly decreased cell  
166 density based on MTS assay (Fig. 2a). This observation was confirmed by a strong

167 decrease in the proliferation associated marker Ki67 in cells treated with 7c (Fig.  
168 2b). Subsequently, to determine whether the effect of 7c on proliferation was dose-  
169 dependent, a serial dilution assay of 7c treatment was performed. Notably, different  
170 concentrations of 7c continued to impair proliferation (Fig. S2a). Overall, these  
171 results validate our transcriptomic findings indicating that mitosis and proliferation  
172 related programs are downregulated upon 7c treatment.

173 Next, in order to investigate whether the decrease in DNA damage upon 7c  
174 treatment was independent of cell cycle impairment, we tested the effect of 7c  
175 treatment under non-proliferative conditions in the presence of low-serum culture  
176 conditions (i.e. 1% FBS culture media). Remarkably, regardless of growth  
177 conditions and proliferation, 7c treatment still induced a reduction in  $\gamma$ H2AX levels  
178 (Fig. 2c), suggesting that the impact of 7c on DNA damage is independent from its  
179 effects on proliferation. In addition, to gain further insight into the metabolic changes  
180 induced upon 7c treatment, we investigated the levels of reactive oxygen species  
181 (ROS), which are associated with mitochondrial function, cellular stress and DNA  
182 damage (Shields, Traa and Van Raamsdonk, 2021). Notably, a significant increase  
183 in reactive oxygen species (ROS) in aged fibroblasts was observed upon 7c  
184 treatment (Fig. 2d). Thus, although 7c treatment can decrease  $\gamma$ H2AX levels, we  
185 find that it also leads to impaired proliferative capacity, even at low concentrations,  
186 and an upregulation of ROS. Taken together, chemical induced partial  
187 reprogramming via 7c treatment in aged human fibroblasts lacks the multiparameter  
188 rejuvenation associated with OSKM-induced reprogramming. In particular, 7c  
189 treatment results in the improvement of several key aging phenotypes such as DNA  
190 damage, epigenetic dysregulation, and senescence markers while at the same time  
191 leading to an impairment of proliferation, increased ROS, and upregulation of *IL6*.



192 These results suggest that further optimization of chemical reprogramming may be  
193 required.

194

195 **A reduced reprogramming cocktail efficiently improves multiple molecular**  
196 **hallmarks of aging**

197 In order to create an optimized cocktail for the amelioration of age-associated  
198 phenotypes by chemical reprogramming, we first sought to remove compounds with  
199 deleterious effects, while still retaining the three key functional categories of  
200 chemical reprogramming compounds: epigenetic modifiers, cell signaling modifiers,  
201 and metabolic switchers (Knyazer *et al.*, 2021). First, using an MTS assay, we  
202 observed that while cell survival was unaffected or enhanced by Repsox or TCP  
203 treatment respectively, it was significantly impaired by CHIR99021, DZNep,  
204 Forskolin, TTNPB, and VPA, in agreement with previous publications and  
205 suggesting their removal (Fig. S2b) (Wu *et al.*, 2006; Jung *et al.*, 2008; Rodriguez  
206 *et al.*, 2013; Fujiwara *et al.*, 2014). In addition, DZNep has a known S-  
207 adenosylhomocysteine (SAH) hydrolase mediated inhibitory effect on the H3K27  
208 methyltransferase EZH2, further supporting its exclusion (Girard *et al.*, 2014). The  
209 remaining compounds, TCP and Repsox, met the selection criteria for chemical  
210 reprogramming functional categories and were thus selected. Therefore, we next  
211 treated aged human fibroblasts with this reduced two-chemical cocktail (2c) for 6  
212 days to determine its effect on aging hallmarks. Strikingly, similar to our previous  
213 results with 7c,  $\gamma$ H2AX levels were significantly decreased upon 2c treatment (Fig.  
214 3a). Furthermore, improvement on  $\gamma$ H2AX levels was observed when cells were  
215 treated with 2c following addition of the DNA damaging agent doxorubicin (Fig.  
216 S3b). Moreover, 2c significantly increased both H3K9me3 and H3K27me3 levels

217 (Fig. 3b-c). Taken together, these data indicate that 2c treatment improves DNA  
218 damage and heterochromatin marks similar to 7c treatment.

219 Next, we sought to determine the impact of 2c treatment on cellular senescence in  
220 both a genotoxic stress induced senescence model using doxorubicin application  
221 and RIS after multiple passages. First, doxorubicin induced senescent cells  
222 pretreated with 2c showed a significant decrease in senescence-associated beta-  
223 galactosidase (SA-beta-gal) levels and *p21* gene expression compared to  
224 untreated controls (Fig. 3d-e). Interestingly, 2c significantly decreased SA-beta-gal  
225 levels only when added prior to induction, indicating a protective rather than  
226 senolytic effect upon genotoxic treatment (Fig. S3c). Moreover, in our RIS model,  
227 SA-beta-gal levels were significantly decreased in aged fibroblasts with continuous  
228 2c treatment (Fig. 3f). In addition, senescence-associated and age-related stress  
229 response genes *p21*, *p53*, and *IL6*, were also downregulated upon 2c treatment  
230 after 6 days or 29 days of treatment (Fig. 3g). Taken together, these data show that  
231 2c treatment reduces cellular senescence and significantly decreases *IL6* levels in  
232 contrast to 7c treatment.

233 Next, as 7c treatment previously led to impaired proliferation and increased ROS  
234 levels, we sought to determine the impact of 2c on these cellular phenotypes.  
235 Importantly, 2c treatment had only a mild effect on cell proliferation compared to the  
236 50% decrease induced by 7c treatment (Fig. 3h). In addition, in clear contrast to the  
237 impact of 7c, 2c treatment significantly decreased ROS levels in aged fibroblasts,  
238 indicating that 2c can markedly improve cellular homeostasis (Fig. 3i). Similarly, we  
239 observed an improvement in ROS levels with 2c treatment when cells were co-  
240 treated with the pro-oxidant Antimycin A (Fig. S3a).

241 Overall, these results show that the reduced 2c cocktail is able to improve multiple  
242 age-related hallmarks including genomic instability, epigenetic dysregulation, and

243 cellular senescence. Importantly, treatment with 2c had a minor effect on  
244 proliferation and led to a decrease in ROS levels. Taken together, these data  
245 indicate that 2c is an optimized cocktail capable of improving multiple age-related  
246 markers in vitro.

247

#### 248 **2c treatment increases *C. elegans* lifespan**

249 Finally, in order to determine whether our 2c cocktail could also impact biological  
250 aging in vivo, we tested the effect of 2c treatment on the lifespan of a commonly  
251 used aging model organism, the nematode *Caenorhabditis elegans*. Towards this  
252 goal, we monitored survival in *C. elegans* treated with either 2c, Repsox, or TCP at  
253 three different concentrations (50, 100, or 200  $\mu$ M) alongside a vehicle control.  
254 Strikingly, we observed that 2c treatment at 50  $\mu$ M was sufficient to extend *C.*  
255 *elegans* median lifespan from 19 to 27 days, corresponding to a 42.1% increase  
256 relative to vehicle control (Fig. 4a, e). To a lesser extent, Repsox or TCP alone at  
257 50  $\mu$ M also increased *C. elegans* median lifespan to 25 days, a 31.6% increase  
258 over vehicle control (Fig. 4a, e). These results indicate that Repsox and TCP are  
259 each able to extend median lifespan in *C. elegans*, and when combined as part of  
260 the 2c cocktail, can lead to an even greater increase in median lifespan.

261 In addition, we observed dose-dependent effects across all treatments (Fig. 4b-e).  
262 Interestingly, the 2c cocktail or Repsox alone did not increase *C. elegans* lifespan  
263 at 200  $\mu$ M (Fig. 4b-c, e), suggesting that this higher dose may impact off target  
264 mechanisms and be slightly toxic. On the other hand, TCP still increased median  
265 lifespan by 15.8% at 100 or 200  $\mu$ M relative to vehicle controls even though it was  
266 most effective at 50  $\mu$ M (Fig. 4d-e). Taken together, these data demonstrate that  
267 the optimized 2c cocktail can both ameliorate multiple aging hallmarks in aged  
268 human fibroblasts in vitro and extend *C. elegans* lifespan in vivo.

269

## 270 **DISCUSSION**

271 The molecular identity and age of somatic cells have proven to be plastic states  
272 that can be reset by cellular reprogramming (Gurdon, 1962; Campbell *et al.*, 1996;  
273 Takahashi and Yamanaka, 2006; Lapasset *et al.*, 2011). As aging and age-  
274 associated diseases are a major societal burden, the need for aging interventions  
275 such as cellular reprogramming has grown (Mahmoudi, Xu and Brunet, 2019;  
276 Garmany, Yamada and Terzic, 2021). Although multiple groups have now  
277 demonstrated that in vivo partial reprogramming via transient application of OSKM  
278 can rejuvenate molecular hallmarks of aging, restore tissue function, and extend  
279 lifespan in mouse models, the risks of oncogenesis and inefficient gene delivery  
280 hinders clinical development (Ocampo *et al.*, 2016; Kurita *et al.*, 2018; de Lázaro *et al.*,  
281 2019; Lu *et al.*, 2020; Rodríguez-Matellán *et al.*, 2020; Sarkar *et al.*, 2020; Chen  
282 *et al.*, 2021; Cheng *et al.*, 2022; Hishida *et al.*, 2022). Interestingly, a more  
283 translational approach for the induction of cellular reprogramming based on the use  
284 of small molecules has been recently developed (Hou *et al.*, 2013; Zhao *et al.*, 2015;  
285 Cao *et al.*, 2018; Guan *et al.*, 2022). Still, the effects of small molecule induced  
286 cellular reprogramming on aging hallmarks and lifespan were, until now, unknown.  
287 Here, we demonstrated for the first time that partial chemical reprogramming  
288 induces multiparameter rejuvenation of key aging hallmarks including genomic  
289 instability, epigenetic dysregulation, and cellular senescence in vitro while  
290 simultaneously extending the lifespan of *C. elegans* in vivo. In particular, we  
291 demonstrated that the seven chemical reprogramming cocktail, defined by Hou *et al.*  
292 *et al.*, was able to improve age-associated DNA damage, epigenetic alterations, and  
293 induce a unique transcriptomic profile enriched for developmental processes in  
294 aged human fibroblasts in vitro. Our observations that 7c significantly impaired

295 proliferation and increased ROS levels might contribute to the previously observed  
296 low efficiency of mouse iPSC induction (Hou *et al.*, 2013). We further revealed that  
297 an optimized two-compound cocktail (2c) is sufficient to decrease the levels of the  
298 DNA damage marker  $\gamma$ H2AX, increase H3K9me3 and H3K27me3, prevent both  
299 replicative and genotoxic induced senescence, and decrease oxidative stress. Most  
300 importantly, we found that our 2c cocktail applied in vivo was able to extend the  
301 median lifespan of *C. elegans* by 42.1%. Interestingly, the highest doses of 2c or  
302 single compounds were less effective to extend lifespan indicating potential off-  
303 target effects that may require further optimization.

304 Previous reports have demonstrated that in vivo treatment with a modified small  
305 molecule reprogramming cocktail similar to Hou *et al.* could enhance regeneration  
306 in the liver and heart, thus providing proof of principle that treatment with these  
307 reprogramming-associated chemicals could benefit tissue repair (Tang and Cheng,  
308 2017; Huang *et al.*, 2018). On the other hand, we have now shown that chemical  
309 reprogramming can improve multiple molecular hallmarks of aging similarly to  
310 OSKM-induced reprogramming, and extend the lifespan of *C. elegans*.  
311 Multiparameter rejuvenation across aging hallmarks is a defining trait of cellular  
312 reprogramming albeit future work is required to properly identify the mechanisms  
313 responsible for these benefits (Chondronasiou *et al.*, 2022; Gill *et al.*, 2022). In this  
314 line, attempts to induce multiparameter amelioration are now emerging as a  
315 strategy for rejuvenation even outside the field of cellular reprogramming. In this  
316 regard, Shaposhnikov *et al.* recently demonstrated a synergistic effect by targeting  
317 multiple aging hallmarks simultaneously, producing a significant increase in  
318 *Drosophila melanogaster* lifespan compared to single interventions (Shaposhnikov  
319 *et al.*, 2022).

320 Importantly, several translational advantages highlight the potential use of chemical  
321 induced partial reprogramming for the amelioration of age-associated phenotypes,  
322 including the fact that small molecules are cell permeable and therefore easy to  
323 deliver. Furthermore, their effects can be modulated via dosage, and are transient  
324 and reversible, thus avoiding oncogenic pitfalls associated with transcription factor  
325 induction (Zhao, 2019). In this proof of principle study, our observations indicate  
326 that chemical reprogramming represents both a valuable opportunity for the  
327 development of future anti-aging interventions, along with the mechanistic  
328 understanding of the complex inter-relationships of aging hallmarks and their  
329 respective amelioration.

330

## 331 **METHODS**

332 **Cell culture and maintenance.** Human dermal fibroblasts were freshly extracted  
333 using Collagenase I (Sigma, C0130) and Dispase II (Sigma, D4693) and cultured  
334 in DMEM (Gibco, 11960085) containing non-essential amino acids (Gibco,  
335 11140035), GlutaMax (Gibco, 35050061), Sodium Pyruvate (Gibco, 11360039) and  
336 10% fetal bovine serum (FBS, Hyclone, SH30088.03) at 37°C in hypoxic conditions  
337 (3% O<sub>2</sub>). Subsequently, fibroblasts were passaged and cultured according to  
338 standard protocols. Aged donor samples were of 56 and 83 years of age.

339

340 **Immunofluorescence staining.** Cells were washed with fresh PBS and then fixed  
341 with 4% paraformaldehyde (Roth, 0964.1) in PBS at room temperature (RT) for 15  
342 minutes. After fixation, cells were washed 3 times, followed by a blocking and  
343 permeabilization step in 1% bovine serum albumin (Sigma, A9647-50G) in PBST  
344 (0.2% Triton X-100 in PBS) for 60 min (Roth, 3051.3). Cells were then incubated at  
345 4°C overnight with appropriate primary antibody, washed in PBS, followed by

346 secondary antibody incubation with DAPI staining at RT for 60 min. Coverslips were  
347 mounted using Fluoromount-G (Thermofisher, 00-4958-02), dried at RT in the dark  
348 for several hours, stored at 4°C until ready to image and -20°C for long-term.

349

350 **Immunofluorescence imaging.** Confocal image acquisition was performed using  
351 the Ti2 Yokogawa CSU-W1 Spinning Disk (Nikon), using the 100X objective and  
352 with 15 z-sections of 0.3 µm intervals. Appropriate lasers were used (405 nm and  
353 488 nm) with a typical laser intensity set to 5-10% transmission of the maximum  
354 intensity for methylated histones, Ki67 and ROS, and 30-40% for phosphorylated  
355 histones. Exposure time and binning were established separately to assure  
356 avoidance of signal saturation.

357

358 **Antibodies and compounds.** Antibodies were provided from the following  
359 companies. Abcam: anti-H3K27me3 (ab192985); Cell Signaling: anti-H3K9me3  
360 (13969), anti-γH2AX (9718), anti-Ki67 (15580); Bioconcept: anti-H3 (13969);  
361 Sigma: anti-β-Actin (A2228); Thermofisher: anti-Rabbit (A32790); Agilent: anti-  
362 Rabbit Immunoglobulins/HRP (P0448), anti-Mouse Immunoglobulins/HRP  
363 (P0447); Roth: DAPI (6843.1)

364 Compounds were purchased from the following companies. Thermo Fisher: DHE  
365 (D11347); Cayman: Valproic Acid (13033), CHIR99021 (13122), Repsox (14794),  
366 Forskolin (11018), Doxorubicin (15007); Acros Organics: TCP (130472500);  
367 APExBIO: DZNep (A8182); Selleckchem: TTNPB (S4627); Roth: X-beta-Gal  
368 (2315.3)

369

370 **RNA analysis.** Total RNA was extracted using Monarch Total RNA Miniprep Kit  
371 (New England Biolabs, T2010S) according to manufacturer's instructions with

372 DNase treatment (Qiagen, 79254) for 15 minutes (1:8 in DNase buffer). Total RNA  
373 concentrations were determined using the Qubit RNA BR Assay Kit (Thermofisher,  
374 Q10211). cDNA synthesis was performed by adding 4  $\mu$ L of iScript™ gDNA Clear  
375 cDNA Synthesis (Biorad, 1725035BUN) to 500ng of RNA sample and run in a  
376 Thermocycler (Biorad, 1861086) with the following protocol: 5 min at 25°C for  
377 priming, 20 min at 46°C for reverse transcription, and 1 min at 95°C for enzyme  
378 inactivation. Final cDNA was diluted 1:5 using autoclaved water and stored at -  
379 20°C. qRT-PCR was performed using SsoAdvanced SYBR Green Supermix (Bio-  
380 Rad, 1725272) in 384-well PCR plates (Thermofisher, AB1384) using the  
381 QuantStudio™ 12K Flex Real-time PCR System instrument (Thermofisher).  
382 Forward and reverse primers (1:1) were used at a final concentration of 5  $\mu$ M with  
383 1  $\mu$ L of cDNA sample. Primer sequences are listed in Table S1.

384

385 **RNA sequencing, processing, analysis.** RNA-Seq library preparation and  
386 sequencing was performed by Novogene (UK) Company Limited on an Illumina  
387 NovaSeq 6000 in 150 bp paired-end mode. Raw FASTQ files were assessed for  
388 quality, adapter content and duplication rates with FastQC. Reads were aligned to  
389 the Human genome (GRCh38) using the STAR aligner (v2.7.9a) (Dobin *et al.*, 2013)  
390 with '--sjdbOverhang 100'. Number of reads per gene was quantified using the  
391 featureCounts function in the subread package (Liao, Smyth and Shi, 2013).  
392 Ensembl transcripts were mapped to gene symbols using the mapIds function in  
393 the AnnotationDbi package (Pagès *et al.*, 2022) with the org.Hs.eg.db reference  
394 package (Carlson, 2019). Raw counts were normalized by library size and  
395 converted to counts per million (CPM) for downstream analysis. Dimensionality  
396 reduction was performed via Principal Component Analysis (PCA) using the R  
397 software. Differentially expressed genes (DEG) were computed by the limma R



398 package (Ritchie *et al.*, 2015), by fitting a linear model on each gene, with an  
399 adjusted p-value of 0.05. Gene set enrichment analysis (GSEA) for gene ontology  
400 (GO) (Ashburner *et al.*, 2000) was performed using the clusterProfiler package (Wu  
401 *et al.*, 2021); (Ashburner *et al.*, 2000), from the list of DEG (with a valid Entrez ID)  
402 ranked by logFoldChange. We used org.HS.eg.db as a reference, selected  
403 Biological Processes (BP) only, and an adjusted p-value of 0.05 (Bonferroni).  
404 Pathways were ranked by Normalized Enrichment Score (NES). Z-Score were  
405 calculated for each gene to plot as a heatmap.

406

407 **MTS cell proliferation assay.** Cell viability and proliferation assays were  
408 performed by Tetrazolium MTS assay. Control and treated cells were cultured for 1  
409 day in 96-well plates then treated with small molecules for 3 consecutive days  
410 before incubation with 120  $\mu$ L fresh media containing 20  $\mu$ L of CellTiter 96@  
411 AQueous One Solution (Promega, G3580) for 1 to 4 hours at 37°C in a humidified,  
412 5% CO<sub>2</sub> atmosphere. The amount of product formed was measured by recording  
413 the absorbance at 490nm using a BioTek Epoch 2 microplate reader. Relative  
414 proportion of viable cells was determined as a relative reduction of the optical  
415 density (OD) compared to control OD.

416

417 **Crystal violet staining.** Cells were cultured as previously described for the MTS  
418 cell proliferation assay. Culture media was then carefully removed from wells and  
419 cells were washed three consecutive times with room temperature PBS (Gibco,  
420 21600069) followed by 45 minutes incubation with crystal violet (Roth, T123.2)  
421 solution (Crystal Violet 0.05%, Formaldehyde 0.4%, Methanol 1% in PBS 1X).  
422 Plates were then washed by careful immersion in tap water 2 times, drained upside  
423 down, and air dried. Finally, solubilization in 1% SDS was performed on an orbital

424 shaker until no dense areas of coloration persisted and absorbance was measured  
425 at 570nm using a BioTek Epoch 2 microplate reader. Relative proportion of viable  
426 cells was determined as a relative reduction of the optical density (OD) compared  
427 to control OD.

428

429 **Senescence-associated  $\beta$ -galactosidase assay.** Senescence-associated beta-  
430 galactosidase (SA- $\beta$ gal) assay was performed as described in the literature  
431 (Debacq-Chainiaux *et al.*, 2009). Briefly, light fixation was performed on cells plated  
432 on glass coverslips using a solution of 3% paraformaldehyde and 0.2%  
433 glutaraldehyde in PBS buffer for 5 minutes. Fixation solution was then removed,  
434 wells were washed several times and stained overnight at 37°C in a CO<sub>2</sub>-free  
435 incubator in a solution of 40 mM citric acid/Na phosphate buffer, 5 mM  
436 K<sub>4</sub>[Fe(CN)<sub>6</sub>]·3H<sub>2</sub>O, 5 mM K<sub>3</sub>[Fe(CN)<sub>6</sub>], 150 mM sodium chloride, 2 mM  
437 magnesium chloride and 1 mg/mL X-gal (Roth, 2315.1) with a pH of 5.9-6.0. Finally,  
438 coverslips were stained with DAPI, followed by standard immunofluorescence  
439 protocol, images were taken using bright-field microscopy, and proportion of  $\beta$ -Gal-  
440 positive cells was then quantified.

441

442 **Reactive Oxygen Species assay.** Mitochondrial reactive oxygen species (ROS)  
443 were measured using the superoxide indicator dihydroethidium (DHE). Briefly, first,  
444 cells were incubated in fresh FBS-free media containing 5  $\mu$ M DHE and incubated  
445 at 37°C in a humidified, 5% CO<sub>2</sub> atmosphere for 30 minutes. Following incubation,  
446 wells were washed with room temperature PBS, fixed with 4% paraformaldehyde  
447 for 15 min and then stained with DAPI. Immediately, images were taken at 554 nm  
448 and standard immunofluorescence imaging protocol was followed.

449

450 **Quantification and statistical analysis.** Analysis of immunofluorescence  
451 microscopy images was performed using ImageJ. A minimum of 50-100 cells were  
452 imaged per condition. Maximal projections of z-stacks were analyzed and total  
453 fluorescence intensity per cell were determined.

454 All statistical parameters such as statistical analysis, statistical significance and n  
455 values are reported in the figure legends. Statistical analyses were performed using  
456 GraphPad Prism 9.0.0. Outliers were systematically removed using the ROUT  
457 method (Q=1%). For in vivo experiments, n corresponds to the numbers of animals  
458 and statistical analysis was performed using SPSS 27.0.1.0 (IBM® SPSS®  
459 Statistics).

460

461 ***C. elegans* strains and maintenance.** Wildtype *C. elegans* (N2) were obtained  
462 from the Caenorhabditis Genetics Center (CGC), University of Minnesota, USA. N2  
463 wildtype worms were maintained at 20°C and were grown on standard Nematode  
464 Growth Media (NGM) plates.

465

466 **Lifespan analysis.** Animals were synchronized and lifespan analyses were  
467 conducted at 20°C as previously described (Porta-de-la-Riva *et al.*, 2012) and were  
468 transferred onto NGM plates containing treatment or vehicle at stage L4. TCP was  
469 dissolved in water at 100 mM and Repsox was dissolved in DMSO at 200 mM. TCP  
470 and Repsox were added directly into the molten agar to a final concentration of 50,  
471 100 or 200 µM each before pouring. After proper drying of plates, UV killed OP50  
472 bacteria were seeded (150 µl of 120 mg/ml UV killed OP50 per P60 plate) and  
473 FUDR (150 µM) added as reproductive suppressant. Treated and control plates  
474 contained an equivalent DMSO concentration. Animals that crawled off the plate or

475 displayed extruded internal organs were censored. Lifespan analyses were  
476 assessed manually by counting live and dead animals based on movement.

477

#### 478 **AUTHOR CONTRIBUTIONS**

479 A.O., P.T.P. and L.S. designed the study. A.O. and L.S. were involved in all  
480 experiments, data collection, analysis and interpretation. A.O., P.T.P. and L.S.  
481 prepared the figures and wrote the manuscript with input from all authors. L.S.,  
482 G.B.P. and N.H.K. performed and analyzed in vivo experiments. C.M. performed  
483 skin fibroblast extractions. L.S. and K.P. prepared and analyzed RNA-seq data.  
484 A.O. and P.T.P. provided assistance, supervision, and guidance.

485

#### 486 **COMPETING INTERESTS**

487 The authors declare no competing interests.

488

#### 489 **ACKNOWLEDGMENTS**

490 We would like to thank all members of the Ocampo laboratory for helpful  
491 discussions. In addition, we would like to thank the UNIL Cellular Imaging Facility  
492 and especially Luigi Bozzo for all technical training and guidance related to imaging.

493

#### 494 **FUNDING**

495 The study was supported by the Swiss National Science Foundation (SNSF) and  
496 the Canton Vaud.

497

#### 498 **REFERENCES**

499 Abad, M. *et al.* (2013) 'Reprogramming in vivo produces teratomas and iPS cells  
500 with totipotency features', *Nature*, 502(7471), pp. 340–345. Available at:  
501 <https://doi.org/10.1038/nature12586>.

- 502 Ashburner, M. *et al.* (2000) 'Gene Ontology: tool for the unification of biology',  
503 *Nature genetics*, 25(1), pp. 25–29. Available at:  
504 <https://doi.org/10.1038/75556>.
- 505 Baker, D.J. *et al.* (2011) 'Clearance of p16Ink4a-positive senescent cells delays  
506 ageing-associated disorders', *Nature*, 479(7372), pp. 232–236. Available at:  
507 <https://doi.org/10.1038/nature10600>.
- 508 Brunet, A. and Berger, S.L. (2014) 'Epigenetics of Aging and Aging-related  
509 Disease', *The Journals of Gerontology: Series A*, 69(Suppl\_1), pp. S17–S20.  
510 Available at: <https://doi.org/10.1093/gerona/glu042>.
- 511 Campbell, K.H.S. *et al.* (1996) 'Sheep cloned by nuclear transfer from a cultured  
512 cell line', *Nature*, 380(6569), pp. 64–66. Available at:  
513 <https://doi.org/10.1038/380064a0>.
- 514 Cao, S. *et al.* (2018) 'Chromatin Accessibility Dynamics during Chemical Induction  
515 of Pluripotency', *Cell Stem Cell*, 22(4), pp. 529–542.e5. Available at:  
516 <https://doi.org/10.1016/j.stem.2018.03.005>.
- 517 Chen, Y. *et al.* (2021) 'Reversible reprogramming of cardiomyocytes to a fetal state  
518 drives heart regeneration in mice', *Science*, 373(6562), pp. 1537–1540.  
519 Available at: <https://doi.org/10.1126/science.abg5159>.
- 520 Cheng, F. *et al.* (2022) 'Partial reprogramming strategy for intervertebral disc  
521 rejuvenation by activating energy switch', *Aging Cell*, 21(4), p. e13577.  
522 Available at: <https://doi.org/10.1111/accel.13577>.
- 523 Chondronasiou, D. *et al.* (2022) 'Multi-omic rejuvenation of naturally aged tissues  
524 by a single cycle of transient reprogramming', *Aging Cell*, 21(3), p. e13578.  
525 Available at: <https://doi.org/10.1111/accel.13578>.
- 526 Conboy, I.M. *et al.* (2005) 'Rejuvenation of aged progenitor cells by exposure to a  
527 young systemic environment', *Nature*, 433(7027), pp. 760–764. Available at:  
528 <https://doi.org/10.1038/nature03260>.
- 529 Debacq-Chainiaux, F. *et al.* (2009) 'Protocols to detect senescence-associated  
530 beta-galactosidase (SA-βgal) activity, a biomarker of senescent cells in  
531 culture and in vivo', *Nature Protocols*, 4(12), pp. 1798–1806. Available at:  
532 <https://doi.org/10.1038/nprot.2009.191>.
- 533 Dhawan, S., Tschen, S.-I. and Bhushan, A. (2009) 'Bmi-1 regulates the Ink4a/Arf  
534 locus to control pancreatic β-cell proliferation', *Genes & Development*, 23(8),  
535 pp. 906–911. Available at: <https://doi.org/10.1101/gad.1742609>.
- 536 Djeghloul, D. *et al.* (2016) 'Age-Associated Decrease of the Histone  
537 Methyltransferase SUV39H1 in HSC Perturbs Heterochromatin and B  
538 Lymphoid Differentiation', *Stem Cell Reports*, 6(6), pp. 970–984. Available at:  
539 <https://doi.org/10.1016/j.stemcr.2016.05.007>.
- 540 Dobin, A. *et al.* (2013) 'STAR: ultrafast universal RNA-seq aligner', *Bioinformatics*,  
541 29(1), pp. 15–21. Available at: <https://doi.org/10.1093/bioinformatics/bts635>.

- 542 Fujiwara, T. *et al.* (2014) '3-Deazaneplanocin A (DZNep), an Inhibitor of S-  
543 Adenosylmethionine-dependent Methyltransferase, Promotes Erythroid  
544 Differentiation \*', *Journal of Biological Chemistry*, 289(12), pp. 8121–8134.  
545 Available at: <https://doi.org/10.1074/jbc.M114.548651>.
- 546 Garmany, A., Yamada, S. and Terzic, A. (2021) 'Longevity leap: mind the  
547 healthspan gap', *npj Regenerative Medicine*, 6(1), pp. 1–7. Available at:  
548 <https://doi.org/10.1038/s41536-021-00169-5>.
- 549 Gill, D. *et al.* (2022) 'Multi-omic rejuvenation of human cells by maturation phase  
550 transient reprogramming', *eLife*. Edited by J.K. Tyler, 11, p. e71624. Available  
551 at: <https://doi.org/10.7554/eLife.71624>.
- 552 Girard, N. *et al.* (2014) '3-Deazaneplanocin A (DZNep), an Inhibitor of the Histone  
553 Methyltransferase EZH2, Induces Apoptosis and Reduces Cell Migration in  
554 Chondrosarcoma Cells', *PLOS ONE*, 9(5), p. e98176. Available at:  
555 <https://doi.org/10.1371/journal.pone.0098176>.
- 556 Guan, J. *et al.* (2022) 'Chemical reprogramming of human somatic cells to  
557 pluripotent stem cells', *Nature*, 605(7909), pp. 325–331. Available at:  
558 <https://doi.org/10.1038/s41586-022-04593-5>.
- 559 Gurdon, J.B. (1962) 'Adult frogs derived from the nuclei of single somatic cells',  
560 *Developmental Biology*, 4(2), pp. 256–273. Available at:  
561 [https://doi.org/10.1016/0012-1606\(62\)90043-X](https://doi.org/10.1016/0012-1606(62)90043-X).
- 562 Haithcock, E. *et al.* (2005) 'Age-related changes of nuclear architecture in  
563 *Caenorhabditis elegans*', *Proceedings of the National Academy of Sciences*,  
564 102(46), pp. 16690–16695. Available at:  
565 <https://doi.org/10.1073/pnas.0506955102>.
- 566 Haridhasapavalan, K.K. *et al.* (2020) 'An Insight into Reprogramming Barriers to  
567 iPSC Generation', *Stem Cell Reviews and Reports*, 16(1), pp. 56–81.  
568 Available at: <https://doi.org/10.1007/s12015-019-09931-1>.
- 569 Hishida, T. *et al.* (2022) 'In vivo partial cellular reprogramming enhances liver  
570 plasticity and regeneration', *Cell Reports*, 39(4), p. 110730. Available at:  
571 <https://doi.org/10.1016/j.celrep.2022.110730>.
- 572 Hou, P. *et al.* (2013) 'Pluripotent Stem Cells Induced from Mouse Somatic Cells by  
573 Small-Molecule Compounds', *Science*, 341(6146), pp. 651–654. Available at:  
574 <https://doi.org/10.1126/science.1239278>.
- 575 Huang, C. *et al.* (2018) 'Chemical-induced cardiac reprogramming in vivo', *Cell*  
576 *Research*, 28(6), pp. 686–689. Available at: <https://doi.org/10.1038/s41422-018-0036-4>.
- 578 Jung, G.-A. *et al.* (2008) 'Valproic acid induces differentiation and inhibition of  
579 proliferation in neural progenitor cells via the beta-catenin-Ras-ERK-  
580 p21Cip/WAF1 pathway', *BMC Cell Biology*, 9(1), p. 66. Available at:  
581 <https://doi.org/10.1186/1471-2121-9-66>.

- 582 Kane, A.E. and Sinclair, D.A. (2019) 'Epigenetic changes during aging and their  
583 reprogramming potential', *Critical Reviews in Biochemistry and Molecular*  
584 *Biology*, 54(1), pp. 61–83. Available at:  
585 <https://doi.org/10.1080/10409238.2019.1570075>.
- 586 Kennedy, B.K. *et al.* (2014) 'Geroscience: Linking Aging to Chronic Disease', *Cell*,  
587 159(4), pp. 709–713. Available at: <https://doi.org/10.1016/j.cell.2014.10.039>.
- 588 Kerepesi, C. *et al.* (2021) 'Epigenetic clocks reveal a rejuvenation event during  
589 embryogenesis followed by aging', *Science Advances*, 7(26), p. eabg6082.  
590 Available at: <https://doi.org/10.1126/sciadv.abg6082>.
- 591 Klimczak, M. (2015) 'Review<br>Oncogenesis and induced pluripotency –  
592 commonalities of signalling pathways', *Contemporary*  
593 *Oncology/Współczesna Onkologia*, 2015(1), pp. 16–21. Available at:  
594 <https://doi.org/10.5114/wo.2014.47133>.
- 595 Knyazer, A. *et al.* (2021) 'Small molecules for cell reprogramming: a systems  
596 biology analysis', *Aging (Albany NY)*, 13(24), pp. 25739–25762. Available at:  
597 <https://doi.org/10.18632/aging.203791>.
- 598 Kurita, M. *et al.* (2018) 'In vivo reprogramming of wound-resident cells generates  
599 skin epithelial tissue', *Nature*, 561(7722), pp. 243–247. Available at:  
600 <https://doi.org/10.1038/s41586-018-0477-4>.
- 601 Lapasset, L. *et al.* (2011) 'Rejuvenating senescent and centenarian human cells by  
602 reprogramming through the pluripotent state', *Genes & Development*, 25(21),  
603 pp. 2248–2253. Available at: <https://doi.org/10.1101/gad.173922.111>.
- 604 de Lázaro, I. *et al.* (2019) 'Non-viral, Tumor-free Induction of Transient Cell  
605 Reprogramming in Mouse Skeletal Muscle to Enhance Tissue Regeneration',  
606 *Molecular Therapy*, 27(1), pp. 59–75. Available at:  
607 <https://doi.org/10.1016/j.ymthe.2018.10.014>.
- 608 Liao, Y., Smyth, G.K. and Shi, W. (2013) 'The Subread aligner: fast, accurate and  
609 scalable read mapping by seed-and-vote', *Nucleic Acids Research*, 41(10),  
610 p. e108. Available at: <https://doi.org/10.1093/nar/gkt214>.
- 611 Longo, V.D. *et al.* (2015) 'Interventions to Slow Aging in Humans: Are We Ready?',  
612 *Aging Cell*, 14(4), pp. 497–510. Available at:  
613 <https://doi.org/10.1111/accel.12338>.
- 614 López-Otín, C. *et al.* (2013) 'The Hallmarks of Aging', *Cell*, 153(6), pp. 1194–1217.  
615 Available at: <https://doi.org/10.1016/j.cell.2013.05.039>.
- 616 Lu, Y. *et al.* (2020) 'Reprogramming to recover youthful epigenetic information and  
617 restore vision', *Nature*, 588(7836), pp. 124–129. Available at:  
618 <https://doi.org/10.1038/s41586-020-2975-4>.
- 619 Ma, Y. *et al.* (2019) 'CHIR-99021 regulates mitochondrial remodelling via  $\beta$ -catenin  
620 signalling and miRNA expression during endodermal differentiation', *Journal*

- 621 *of Cell Science*, 132(15), p. jcs229948. Available at:  
622 <https://doi.org/10.1242/jcs.229948>.
- 623 Mahmoudi, S., Xu, L. and Brunet, A. (2019) 'Turning back time with emerging  
624 rejuvenation strategies', *Nature Cell Biology*, 21(1), pp. 32–43. Available at:  
625 <https://doi.org/10.1038/s41556-018-0206-0>.
- 626 Ni, Z. *et al.* (2012) 'Two SET domain containing genes link epigenetic changes and  
627 aging in *Caenorhabditis elegans*', *Aging Cell*, 11(2), pp. 315–325. Available  
628 at: <https://doi.org/10.1111/j.1474-9726.2011.00785.x>.
- 629 Niccoli, T. and Partridge, L. (2012) 'Ageing as a Risk Factor for Disease', *Current*  
630 *Biology*, 22(17), pp. R741–R752. Available at:  
631 <https://doi.org/10.1016/j.cub.2012.07.024>.
- 632 Ocampo, A. *et al.* (2016) 'In Vivo Amelioration of Age-Associated Hallmarks by  
633 Partial Reprogramming', *Cell*, 167(7), pp. 1719–1733.e12. Available at:  
634 <https://doi.org/10.1016/j.cell.2016.11.052>.
- 635 Ocampo, A., Reddy, P. and Belmonte, J.C.I. (2016) 'Anti-Aging Strategies Based  
636 on Cellular Reprogramming', *Trends in Molecular Medicine*, 22(8), pp. 725–  
637 738. Available at: <https://doi.org/10.1016/j.molmed.2016.06.005>.
- 638 Ohnishi, K. *et al.* (2014) 'Premature Termination of Reprogramming In Vivo Leads  
639 to Cancer Development through Altered Epigenetic Regulation', *Cell*, 156(4),  
640 pp. 663–677. Available at: <https://doi.org/10.1016/j.cell.2014.01.005>.
- 641 Olova, N. *et al.* (2019) 'Partial reprogramming induces a steady decline in  
642 epigenetic age before loss of somatic identity', *Aging Cell*, 18(1), p. e12877.  
643 Available at: <https://doi.org/10.1111/accel.12877>.
- 644 Pagès, H. *et al.* (2022) *AnnotationDbi: Manipulation of SQLite-based annotations*  
645 *in Bioconductor*. Bioconductor version: Release (3.15). Available at:  
646 <https://doi.org/10.18129/B9.bioc.AnnotationDbi>.
- 647 Porta-de-la-Riva, M. *et al.* (2012) 'Basic *Caenorhabditis elegans* Methods:  
648 Synchronization and Observation', *Journal of Visualized Experiments : JoVE*,  
649 (64), p. 4019. Available at: <https://doi.org/10.3791/4019>.
- 650 Rando, T.A. and Chang, H.Y. (2012) 'Aging, Rejuvenation, and Epigenetic  
651 Reprogramming: Resetting the Aging Clock', *Cell*, 148(1), pp. 46–57.  
652 Available at: <https://doi.org/10.1016/j.cell.2012.01.003>.
- 653 Ritchie, M.E. *et al.* (2015) 'limma powers differential expression analyses for RNA-  
654 sequencing and microarray studies', *Nucleic Acids Research*, 43(7), p. e47.  
655 Available at: <https://doi.org/10.1093/nar/gkv007>.
- 656 Rodriguez, G. *et al.* (2013) 'Forskolin-inducible cAMP Pathway Negatively  
657 Regulates T-cell Proliferation by Uncoupling the Interleukin-2 Receptor  
658 Complex \*', *Journal of Biological Chemistry*, 288(10), pp. 7137–7146.  
659 Available at: <https://doi.org/10.1074/jbc.M112.408765>.



- 660 Rodríguez-Matellán, A. *et al.* (2020) 'In Vivo Reprogramming Ameliorates Aging  
661 Features in Dentate Gyrus Cells and Improves Memory in Mice', *Stem Cell*  
662 *Reports*, 15(5), pp. 1056–1066. Available at:  
663 <https://doi.org/10.1016/j.stemcr.2020.09.010>.
- 664 Sarkar, T.J. *et al.* (2020) 'Transient non-integrative expression of nuclear  
665 reprogramming factors promotes multifaceted amelioration of aging in human  
666 cells', *Nature Communications*, 11(1), p. 1545. Available at:  
667 <https://doi.org/10.1038/s41467-020-15174-3>.
- 668 Scaffidi, P. and Misteli, T. (2006) 'Lamin A-Dependent Nuclear Defects in Human  
669 Aging', *Science*, 312(5776), pp. 1059–1063. Available at:  
670 <https://doi.org/10.1126/science.1127168>.
- 671 Seisenberger, S. *et al.* (2013) 'Reprogramming DNA methylation in the mammalian  
672 life cycle: building and breaking epigenetic barriers', *Philosophical*  
673 *Transactions of the Royal Society B: Biological Sciences*, 368(1609), p.  
674 20110330. Available at: <https://doi.org/10.1098/rstb.2011.0330>.
- 675 Shaposhnikov, M.V. *et al.* (2022) 'Molecular mechanisms of exceptional lifespan  
676 increase of *Drosophila melanogaster* with different genotypes after  
677 combinations of pro-longevity interventions', *Communications Biology*, 5(1),  
678 pp. 1–15. Available at: <https://doi.org/10.1038/s42003-022-03524-4>.
- 679 Shields, H.J., Traa, A. and Van Raamsdonk, J.M. (2021) 'Beneficial and  
680 Detrimental Effects of Reactive Oxygen Species on Lifespan: A  
681 Comprehensive Review of Comparative and Experimental Studies', *Frontiers*  
682 *in Cell and Developmental Biology*, 9. Available at:  
683 <https://www.frontiersin.org/article/10.3389/fcell.2021.628157> (Accessed: 30  
684 June 2022).
- 685 Takahashi, K. and Yamanaka, S. (2006) 'Induction of Pluripotent Stem Cells from  
686 Mouse Embryonic and Adult Fibroblast Cultures by Defined Factors', *Cell*,  
687 126(4), pp. 663–676. Available at: <https://doi.org/10.1016/j.cell.2006.07.024>.
- 688 Tang, Y. and Cheng, L. (2017) 'Cocktail of chemical compounds robustly promoting  
689 cell reprogramming protects liver against acute injury', *Protein & Cell*, 8(4),  
690 pp. 273–283. Available at: <https://doi.org/10.1007/s13238-017-0373-y>.
- 691 Wu, K. *et al.* (2006) 'Receptor-selective retinoids inhibit the growth of normal and  
692 malignant breast cells by inducing G1 cell cycle blockade', *Breast Cancer*  
693 *Research and Treatment*, 96(2), pp. 147–157. Available at:  
694 <https://doi.org/10.1007/s10549-005-9071-1>.
- 695 Wu, T. *et al.* (2021) 'clusterProfiler 4.0: A universal enrichment tool for interpreting  
696 omics data', *The Innovation*, 2(3), p. 100141. Available at:  
697 <https://doi.org/10.1016/j.xinn.2021.100141>.
- 698 Zhao, Y. *et al.* (2015) 'A XEN-like State Bridges Somatic Cells to Pluripotency  
699 during Chemical Reprogramming', *Cell*, 163(7), pp. 1678–1691. Available at:  
700 <https://doi.org/10.1016/j.cell.2015.11.017>.

701 Zhao, Y. (2019) 'Chemically induced cell fate reprogramming and the acquisition of  
702 plasticity in somatic cells', *Current Opinion in Chemical Biology*, 51, pp. 146–  
703 153. Available at: <https://doi.org/10.1016/j.cbpa.2019.04.025>.

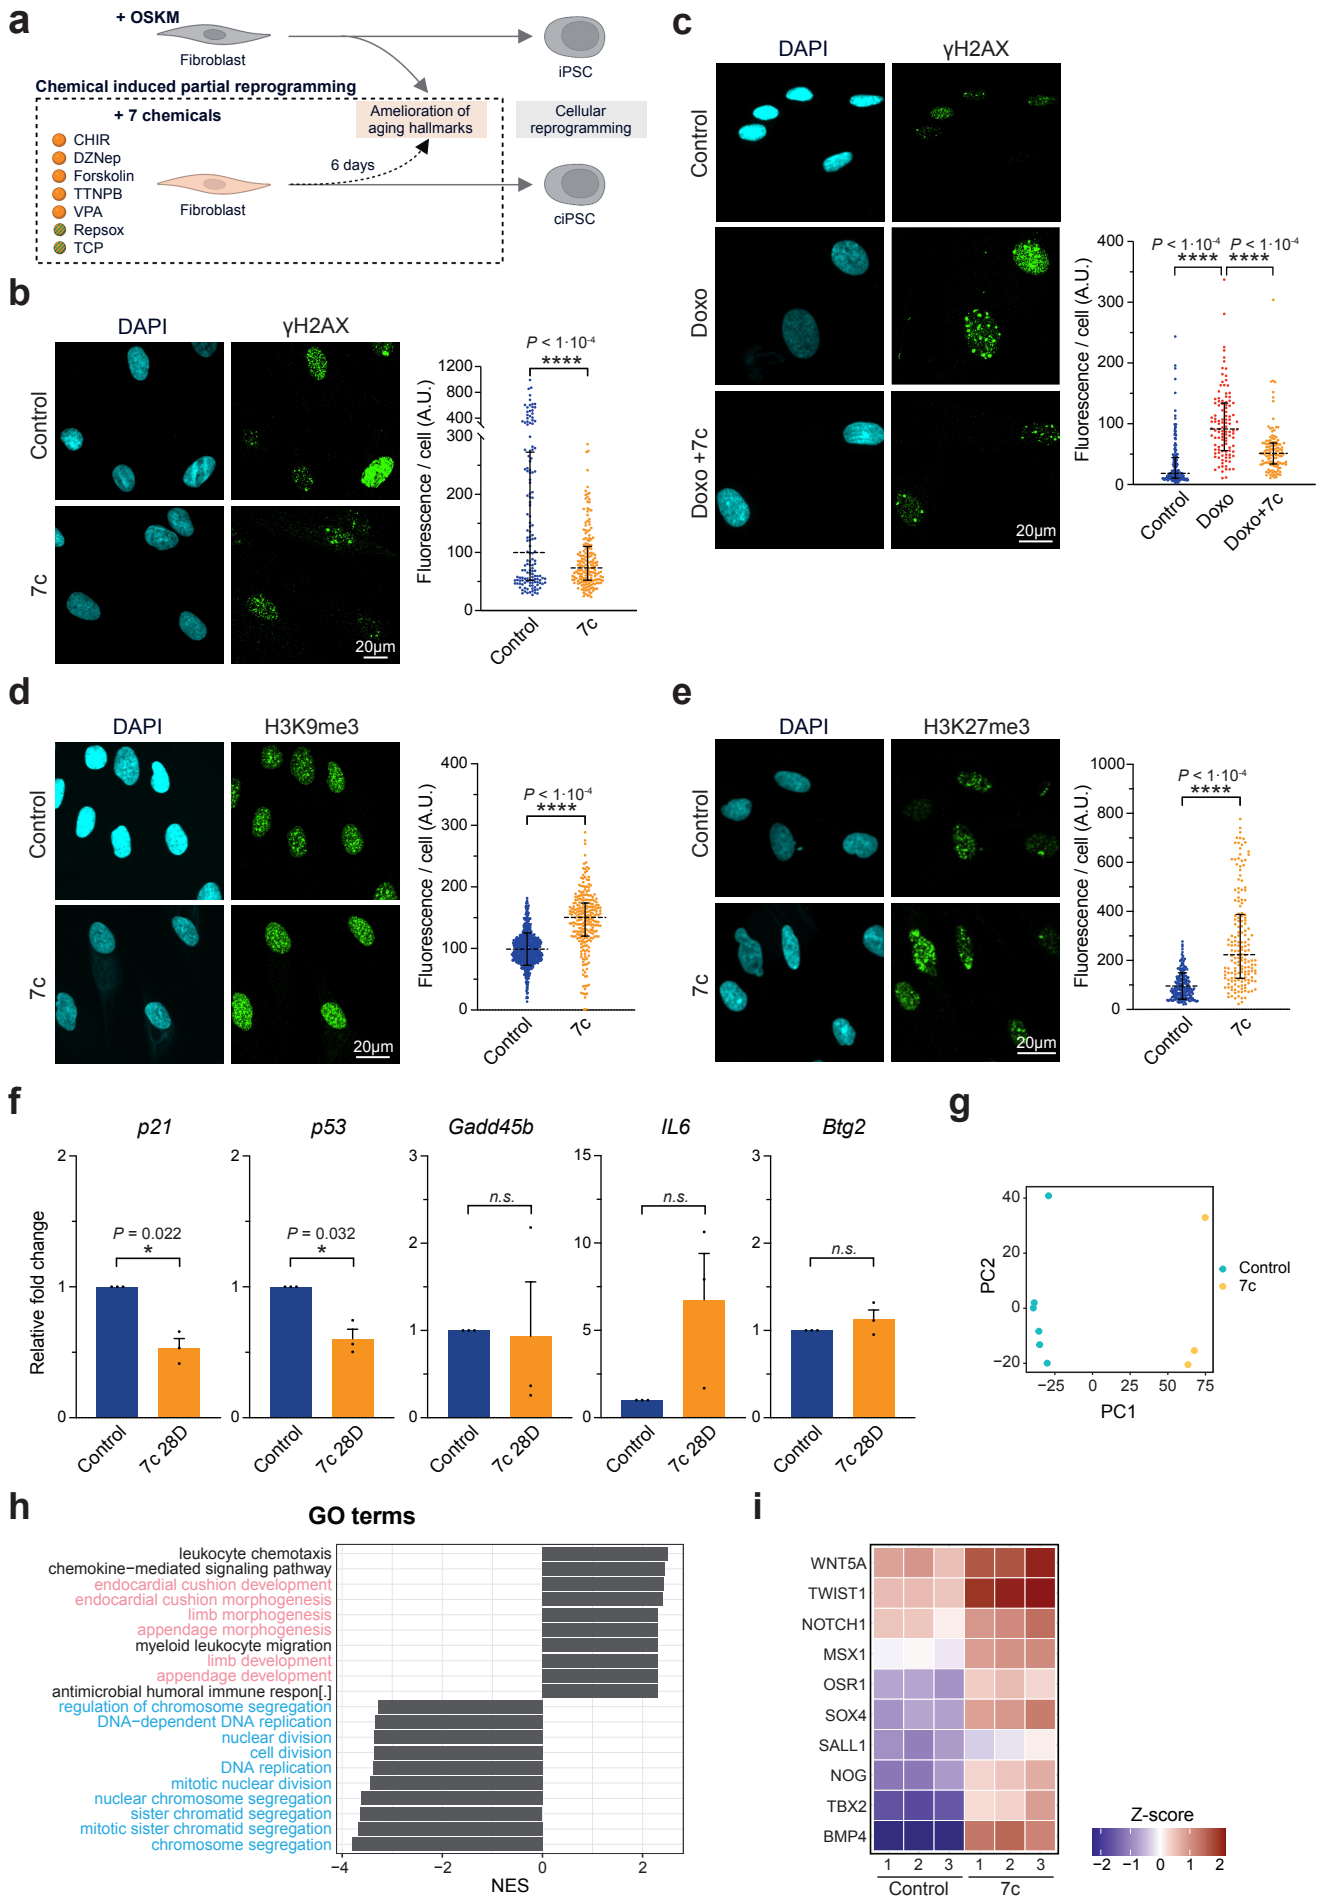

**Figure 1 | Chemical induced partial reprogramming significantly improves aged hallmarks in aged human fibroblasts.** **a**, Schematic representation of chemical induced partial reprogramming via 6 days treatment with the 7 chemicals previously shown to induce mouse chemical iPSC (Hou *et al.*, 2013). **b-c**, Immunofluorescence and quantification of  $\gamma$ H2AX following 7c treatment (**b**) or Doxorubicin (100 nM) and 7c treatment (**c**). **d-e**, Immunofluorescence and quantification of H3K9me3 (**d**) and H3K27me3 (**e**) following 7c treatment. **f**, mRNA levels of senescence-associated and age-related stress response genes in the *p53* tumor suppressor pathway following 7c treatment during replicative induced senescence (RIS; 28 days). **g**, Principal component analysis (PCA) of control (blue) and 7c treated (orange) fibroblasts. **h**, Gene ontology (GO) enrichment analysis following 7c treatment with developmental (in pink) and cell cycle (in blue) pathways highlighted. **i**, List of differentially expressed genes associated with developmental pathways following 7c treatment. Data are median  $\pm$  IQR (**b-c**), mean  $\pm$  SEM (**d-f**). (**b-c**)  $n=2$ , (**d-i**)  $n=3$ . Statistical significance was assessed by comparison to untreated control using paired two-tailed *t*-test (**b-f**). NES, Normalized enrichment scores.

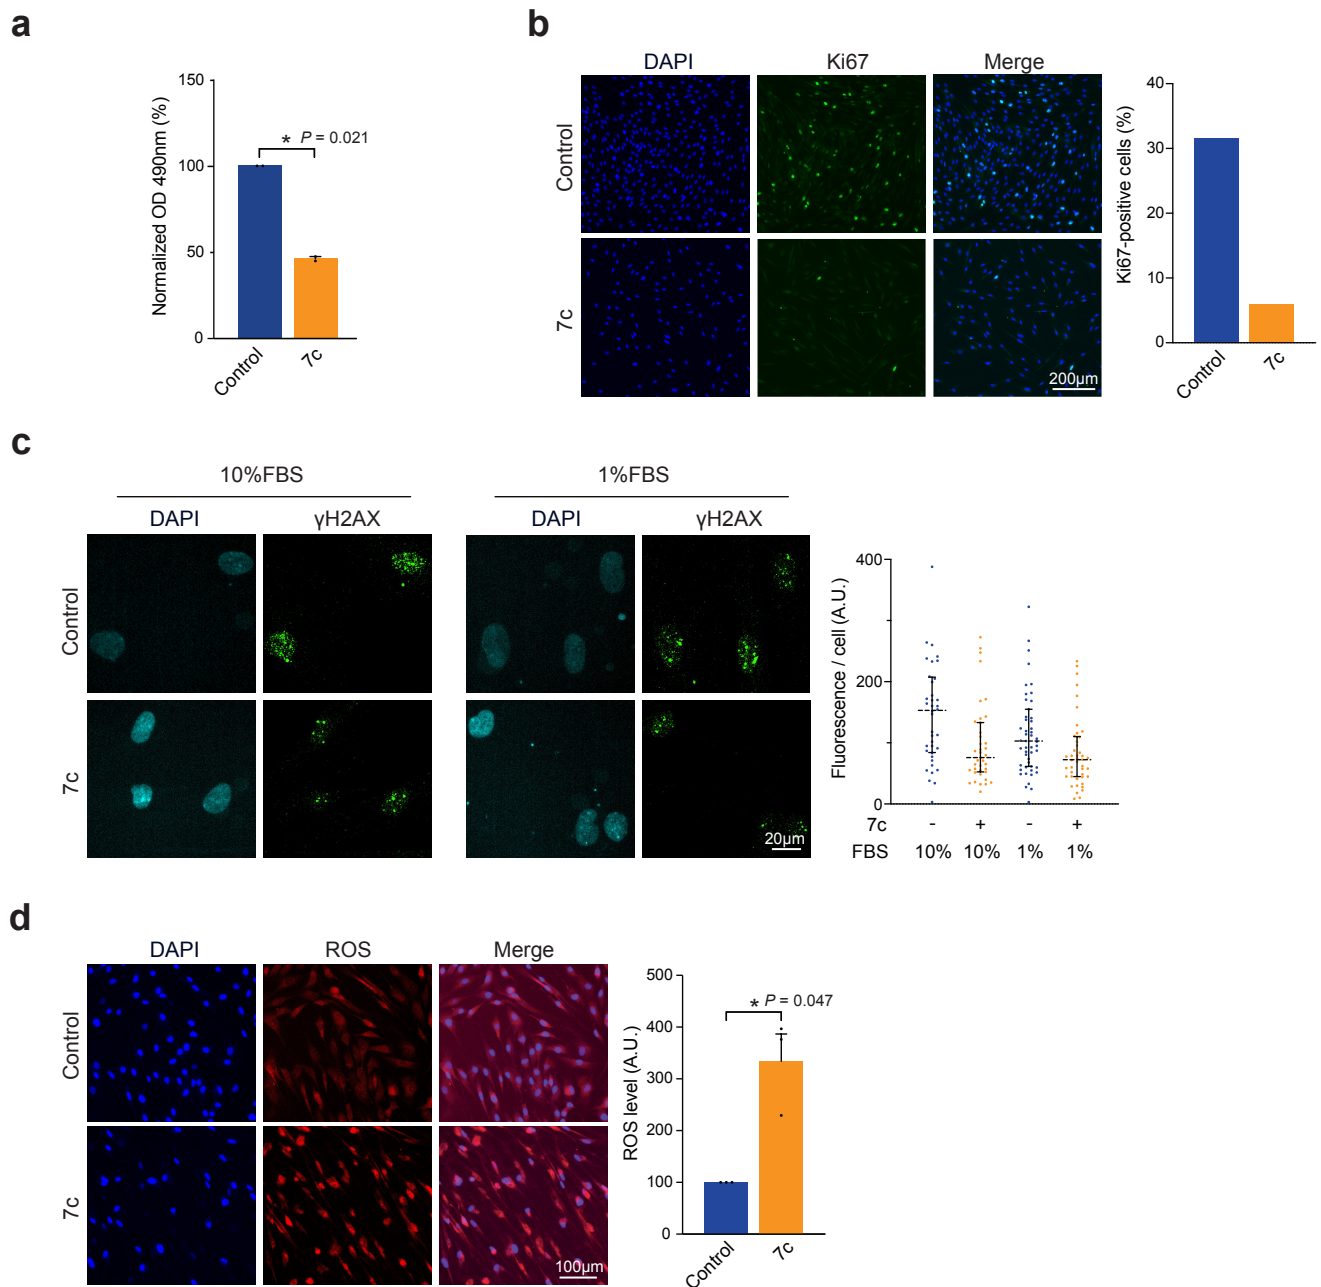

**Figure 2 | ciPR via 7 chemicals does not fully induce multiparameter rejuvenation. a**, MTS quantification of cell density following 7c treatment until confluency. **b**, Immunofluorescence and quantification of Ki67 following 7c treatment (6 days, “6D”). **c**, Immunofluorescence and quantification of  $\gamma$ H2AX following 7c treatment (6D) in proliferative (10%FBS) and non-proliferative (1%FBS) conditions (6D). **d**, Fluorescence detection and quantification of reactive oxygen species (ROS) following 7c treatment (6D). Data are mean  $\pm$  SEM (**a**, **d**), median  $\pm$  IQR (**c**). (**a-b**)  $n=2$ , (**c**)  $n=1$ , (**d**)  $n=3$ . Statistical significance was assessed by comparison to untreated control using paired two-tailed  $t$ -test (**a**, **d**). OD, Optical Density.

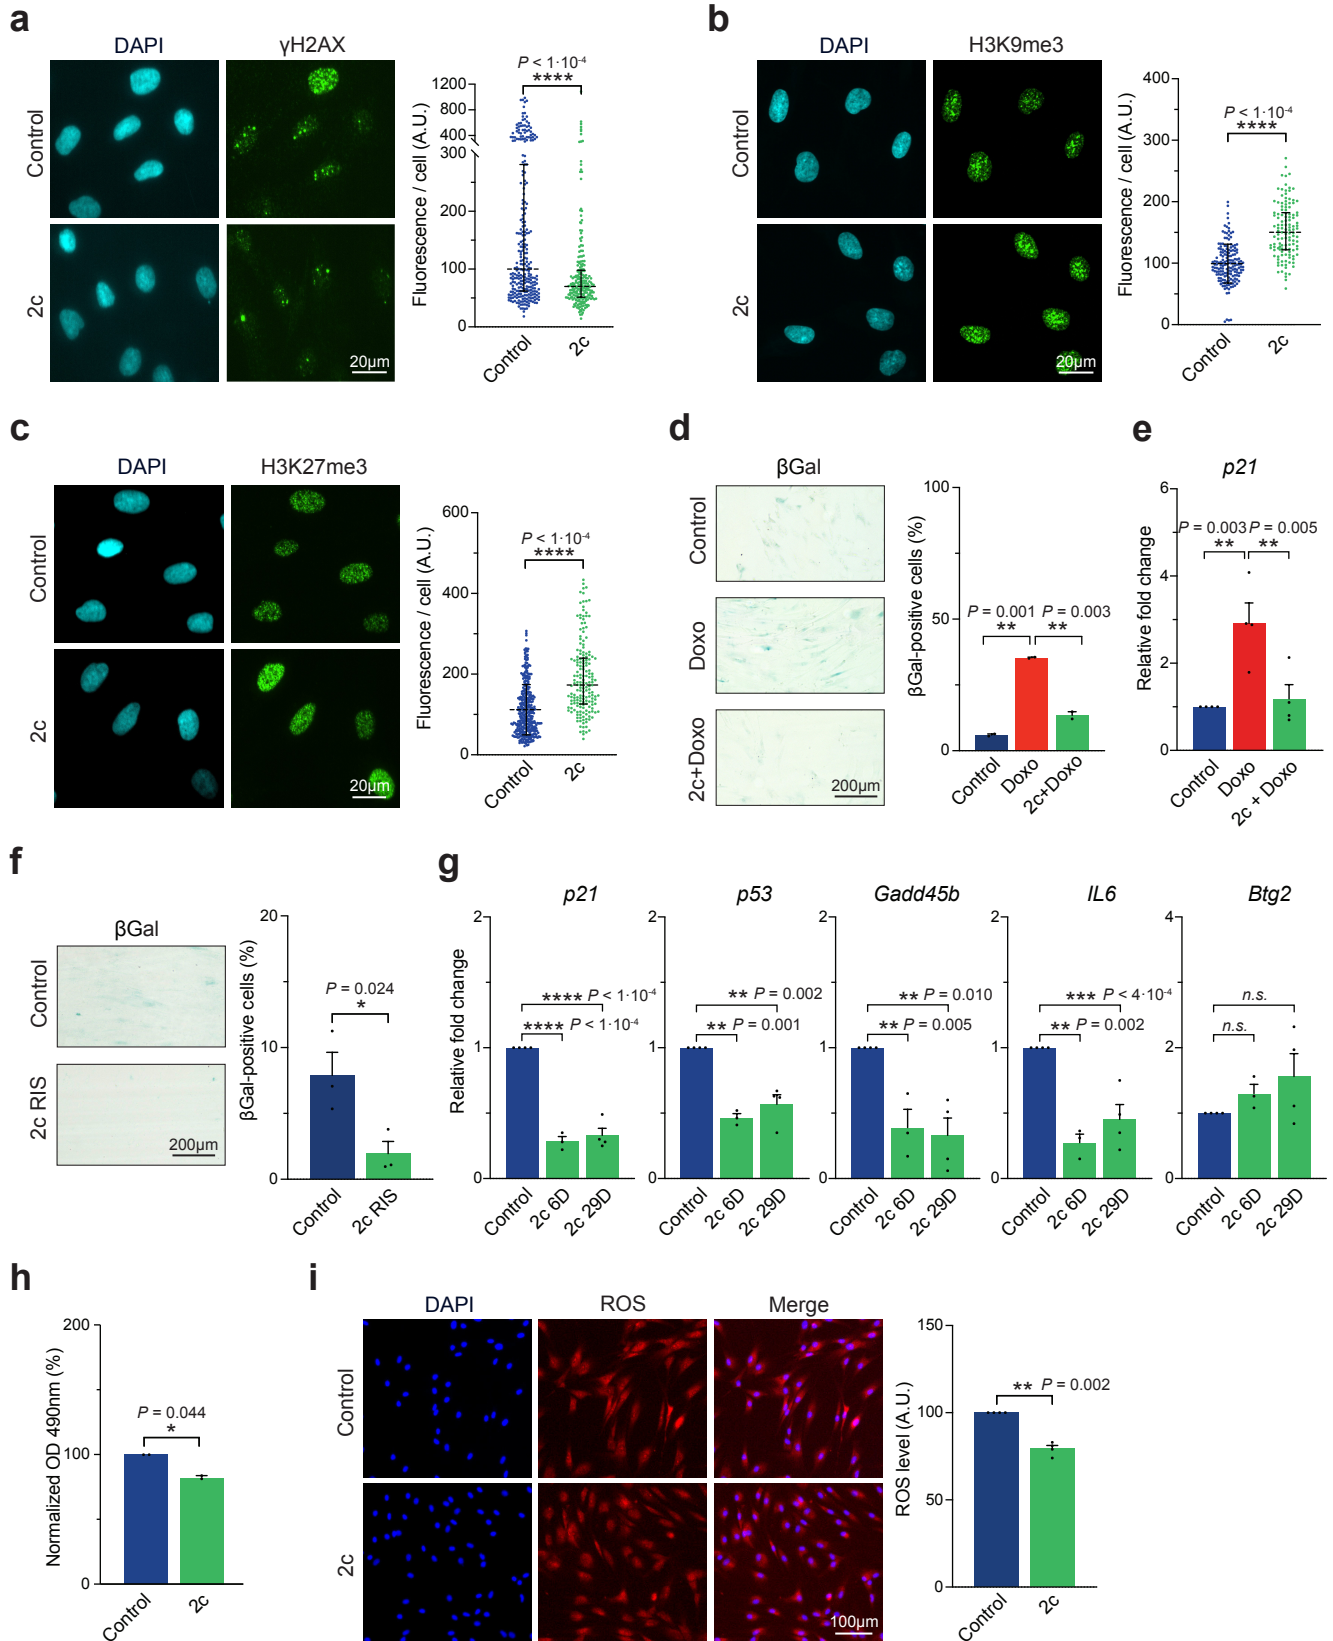

### **Figure 3 | Optimized cocktail (2c) efficiently improves multiple molecular hallmarks of aging.**

**a**, Immunofluorescence and quantification of  $\gamma$ H2AX following TCP + Repsox (2c, 5  $\mu$ M each) treatment (6 days, “6D”). **b-c**, Immunofluorescence and quantification of H3K9me3 (**b**) and H3K27me3 (**c**) following 2c treatment (6D). **d**, Senescence-associated beta-galactosidase (SA-beta-gal) staining and quantification following Doxorubicin (100 nM) in 2c pre-treated fibroblasts (6D). **e**, mRNA levels of senescence-associated *p21* expression following Doxorubicin (100 nM) in 2c pretreated fibroblasts (29D). **f**, SA-beta-gal staining and quantification of replicative induced senescence (RIS) following long-term (29D) 2c treatment. **g**, mRNA levels of senescence-associated and age-related stress response genes in the *p53* tumor suppressor pathway following 2c treatment. **h**, MTS quantification of cell density following 2c treatment until confluency. **i**, Fluorescence detection and quantification of ROS following 2c treatment (6D). Data are median  $\pm$  IQR (**a**), mean  $\pm$  SEM (**b-i**). (**a-c**, **e-g**, **i**)  $n \geq 3$ , (**d**, **h**)  $n = 2$ . Statistical significance was assessed by comparison to untreated control using paired two-tailed *t*-test (**f**, **h-i**), one-way ANOVA and Dunnett correction (**d-e**, **g**). OD, Optical Density.

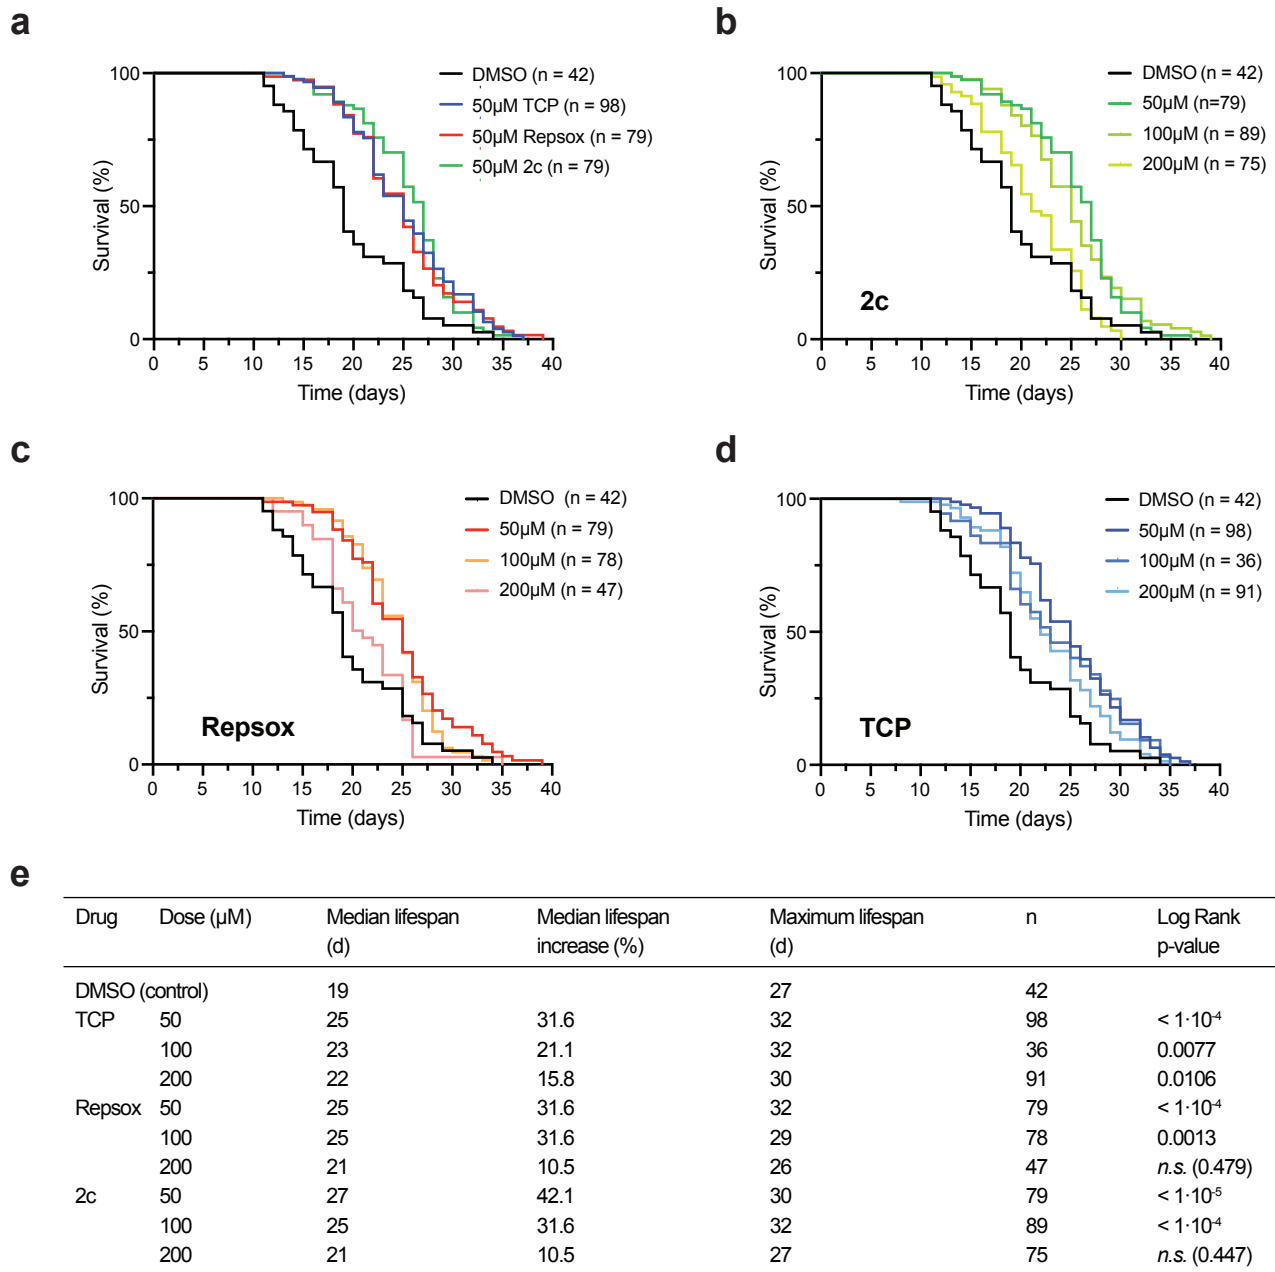

**Figure 4 | Treatment with 2c increases *C. elegans* lifespan.** **a**, Survival of N2 *C. elegans* upon treatment of TCP (50  $\mu\text{M}$ ), Repsox (50  $\mu\text{M}$ ), and 2c (TCP + Repsox, 50  $\mu\text{M}$  each). **b-d**, Survival of N2 *C. elegans* upon treatment with 2c (**b**), Repsox (**c**), and TCP (**d**) at 50, 100, or 200  $\mu\text{M}$ . **e**, Summary of survival assay results including median lifespan, maximal (90%) lifespan, and statistical analyses. Median lifespan increase relative to vehicle control. Statistical significance was assessed by comparison to untreated control using Log-Rank (Mantel-Cox) test.



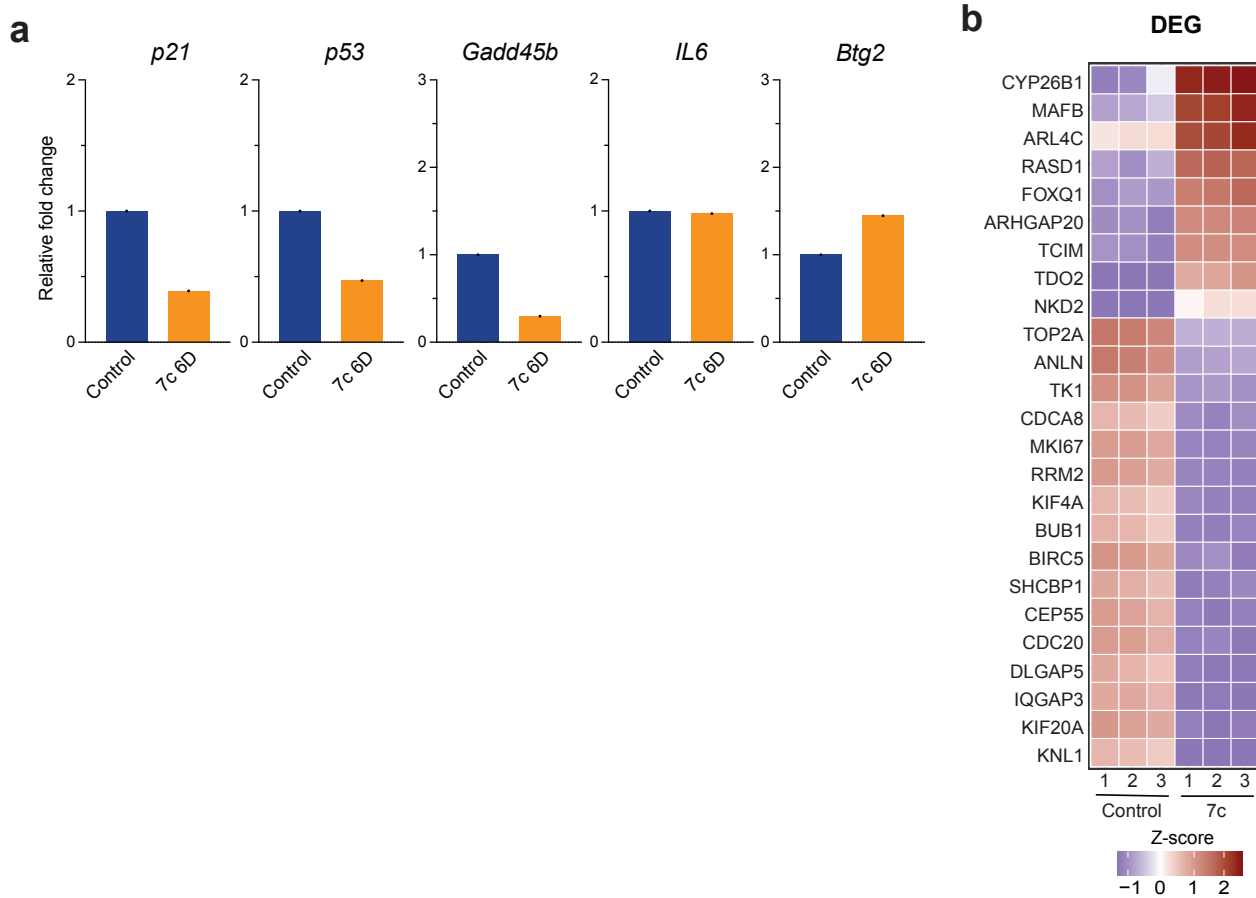

**Figure S1 | Gene expression analysis of chemical induced partial reprogramming with 7c treatment.** **a**, mRNA levels of senescence-associated and age-related stress response genes in the *p53* tumor suppressor pathway following 7c treatment (6 days). **b**, Top differentially expressed genes following 7c treatment relative to untreated controls in human fibroblasts. **(a)**  $n=1$ , **(b)**  $n=3$ . DEG, differentially expressed genes.

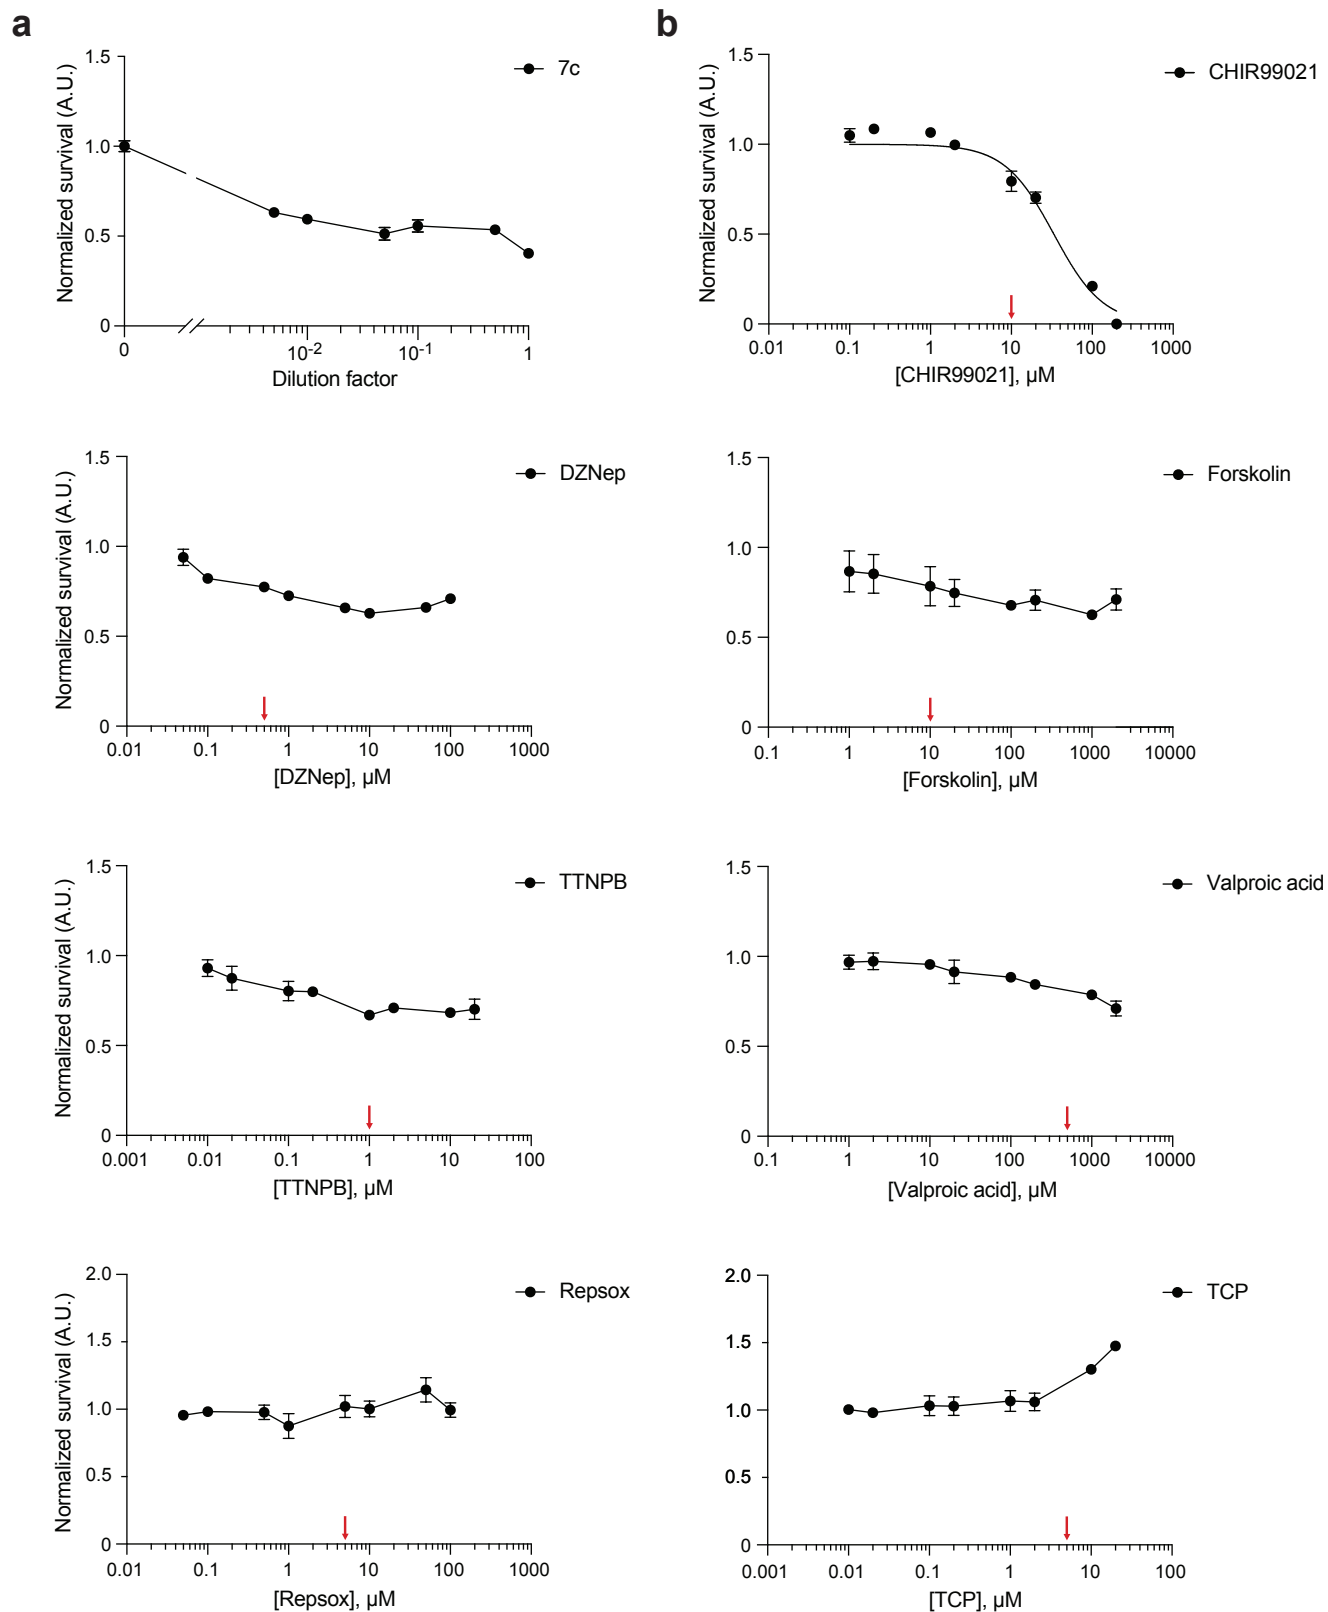

**Figure S2 | Serial dilution of the reprogramming chemicals.** **a**, Crystal violet quantification of cell density following treatment until confluency with serial dilutions of the 7c reprogramming cocktail. **b**, MTS quantification of cell density following treatment until confluency with different concentration of the reprogramming chemicals. Red arrows indicate experimental concentrations. Initial concentrations noted in Table S2. Nonlinear regression displayed when possible. Data are mean  $\pm$  SEM.

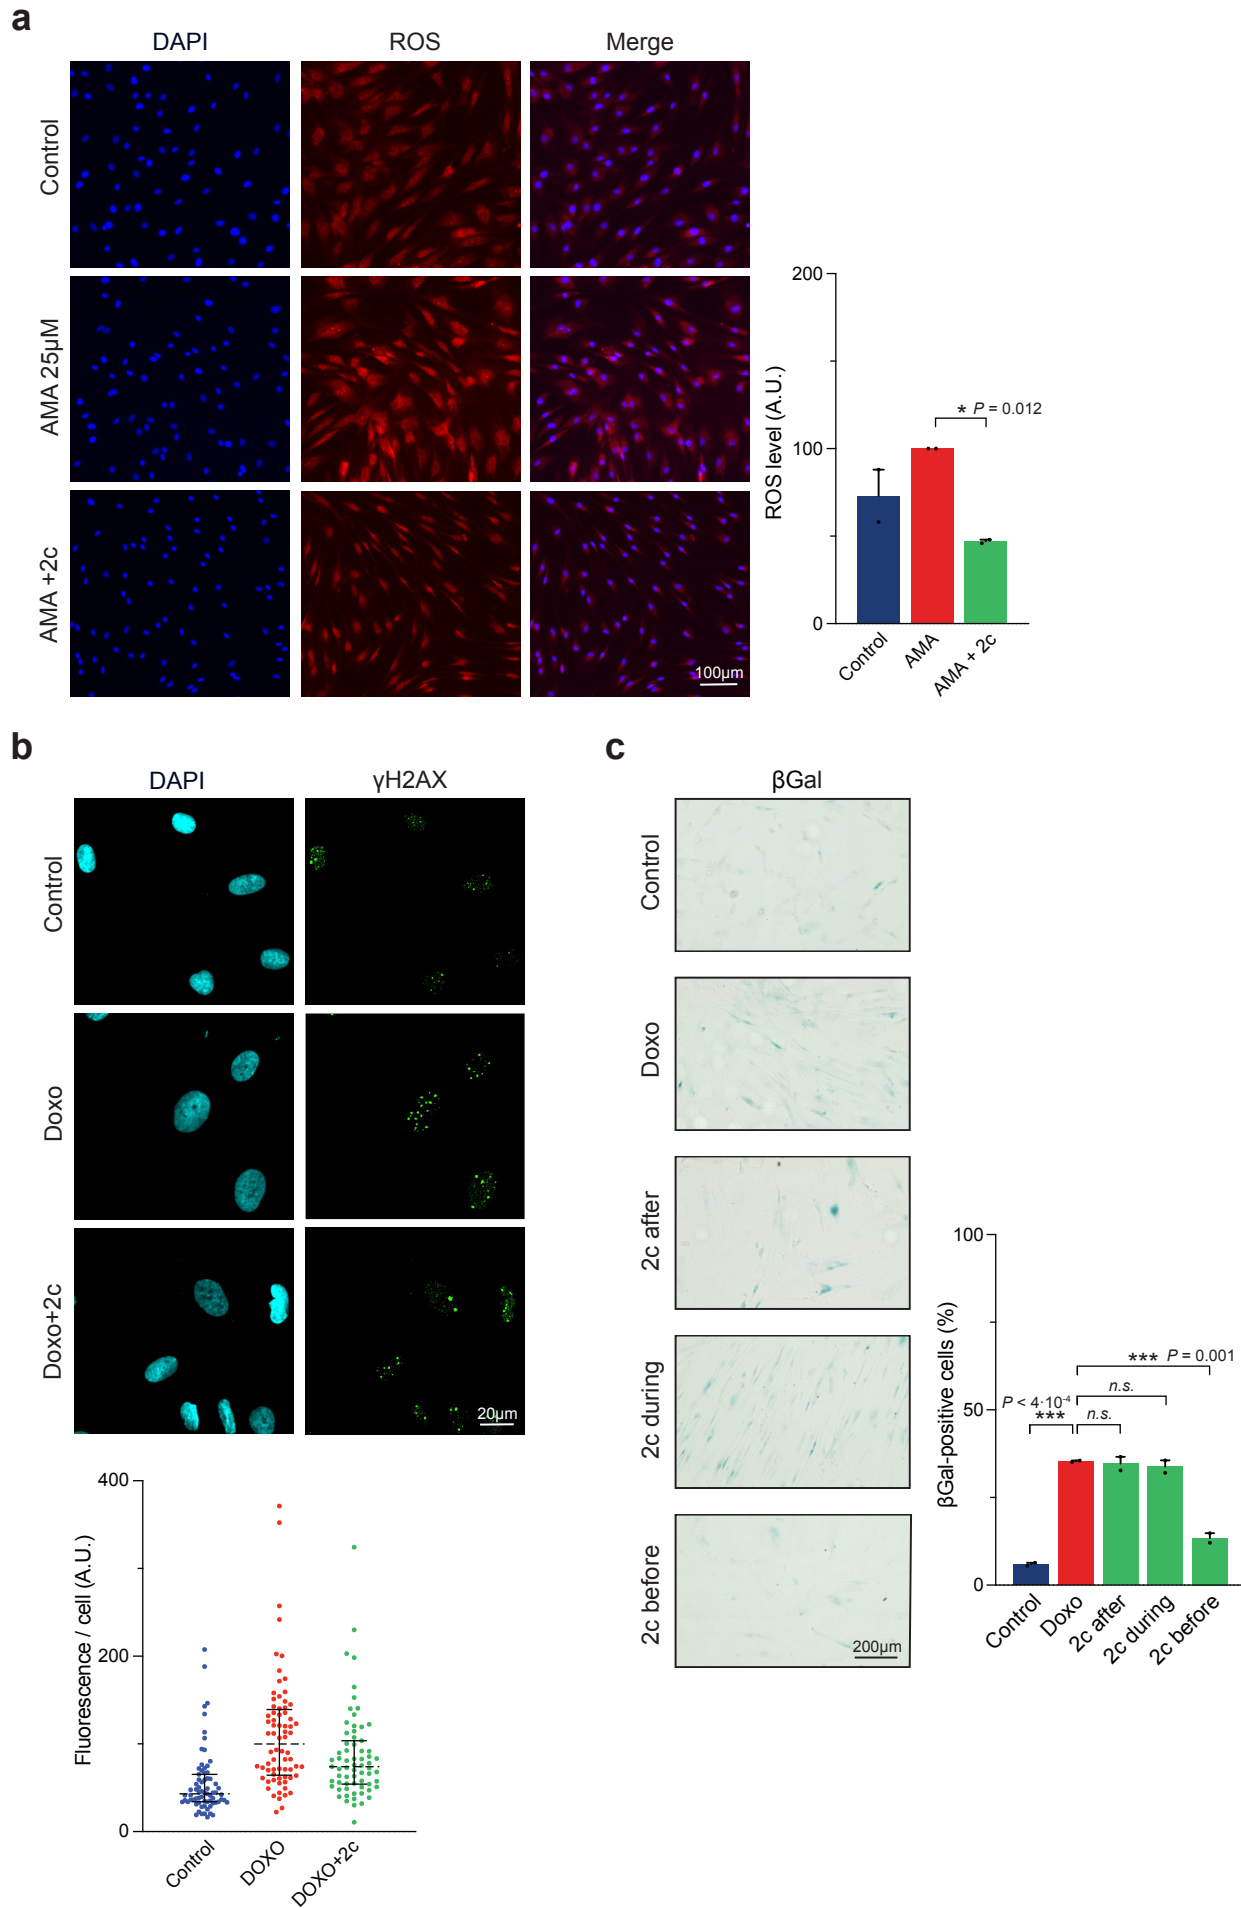

**Figure S3 | Reduced 2c cocktail efficiently ameliorates multiple hallmarks of aging.**

**a**, Fluorescence detection and quantification of ROS following AMA (25  $\mu$ M) and 2c treatment (6 days, “6D”). **b**, Immunofluorescence and quantification of  $\gamma$ H2AX following 2c treatment. **c**, Senescence-associated beta-galactosidase (SA-beta-gal) staining and quantification in 2c treated fibroblasts before, during, and after Doxorubicin (100 nM) treatment (6D). Data are mean  $\pm$  SEM (**a**, **c**), median  $\pm$  IQR (**b**). (**a-c**) n=2, (**b**) n=1. Statistical significance was assessed by comparison to untreated control using paired two-tailed *t*-test (**a**), one-way ANOVA and Dunnett correction (**c**).

| Human gene     | Sequence (5' → 3') |                          |
|----------------|--------------------|--------------------------|
| <i>18S</i>     | Forward            | GGCGCCCCCTCGATGCTCTTAG   |
|                | Reverse            | GCTCGGGCCTGCTTTGAACACTCT |
| <i>p16</i>     | Forward            | GGGTCGGGTGAGAGTGG        |
|                | Reverse            | CGAATAGTTACGGTCGGAGG     |
| <i>p21</i>     | Forward            | CATGGGTTCTGACGGACATC     |
|                | Reverse            | TGCCGAAGTCAGTTCCTTGT     |
| <i>p53</i>     | Forward            | GCTTTCCACGACGGTGAC       |
|                | Reverse            | GCTCGACGCTAGGATCTGAC     |
| <i>Il6</i>     | Forward            | AGTGAGGAACAAGCCAGAGC     |
|                | Reverse            | GTCAGGGGTGGTTATTGCAT     |
| <i>Gadd45b</i> | Forward            | ACAGTGGGGGTGTACGAGTC     |
|                | Reverse            | GATGTCATCCTCCTCCTCCTC    |
| <i>Btg2</i>    | Forward            | CTCCAGGAGGCACTCACAG      |
|                | Reverse            | ATGATGGGGTCCATCTTGTG     |

**Table S1 | Primers set for qRT-PCR.**

| Drug            | Mol. Weight (kDa) | Concentration used (μM) |
|-----------------|-------------------|-------------------------|
| Valproic acid   | 166.2             | 500                     |
| CHIR99021       | 465.3             | 10                      |
| Repsox          | 287.3             | 5                       |
| Tranylcipromine | 169.7             | 5                       |
| Forskolin       | 410.5             | 10                      |
| DZNep           | 298.7             | 0.5                     |
| TTNPB           | 348.5             | 1                       |

**Table S2 | Table of reprogramming chemicals and respective concentrations used.**
